# Supplementary material for: Towards solvent regulated self-activation of N-terminal disulfide bond oxidoreductase-D
Source: Royal Society of Chemistry journal article supplement (doi:10.1039/d1cp05819c), 2022-01-01
Supplement: d1cp05819c1.pdf [file d1cp05819c1.pdf]

**Supporting Information**  
**Towards Solvent Regulated Self-Activation of N-Terminal**  
**Disulfide Bond Oxidoreductase-D**

Aparna G Nair<sup>a‡</sup>, D. Sravanakumar Perumalla<sup>a,b‡</sup>, and Padmesh Anjukandi<sup>\*a\*</sup>

<sup>a</sup> *Department of Chemistry, Indian Institute of Technology,*

*Palakkad-678557, Kerala, India. E-mail: padmesh@iitpkd.ac.in*

<sup>b</sup> *'Present Address': Department of Inorganic and Physical Chemistry,*

*Indian Institute of Science, Bengaluru-560012, India.*

---

\* padmesh@iitpkd.ac.in

**CONTENTS**

|                                                                                        |    |
|----------------------------------------------------------------------------------------|----|
| S1. Methods                                                                            | 4  |
| A. Molecular Mechanics- Molecular Dynamics Simulations                                 | 4  |
| B. QM/MM Molecular Dynamics                                                            | 5  |
| C. Metadynamics                                                                        | 5  |
| D. DFT Calculations                                                                    | 6  |
| S2. Nucleophile Generating Residues near the Active Site                               | 7  |
| A. Proton Transfer From Tyr <sub>40/42/71</sub> OH To Asp <sub>68</sub> O <sup>-</sup> | 7  |
| B. Distance between Asp <sub>68</sub> O <sup>-</sup> and Tyr <sub>40/42</sub> OH       | 7  |
| C. Distance between Asp <sub>68</sub> O <sup>-</sup> and Tyr <sub>71</sub> OH          | 11 |
| D. Asp <sub>68</sub> O <sup>-</sup> as a nucleophile                                   | 11 |
| E. Defining QM region                                                                  | 13 |
| S3. Presence of cap-loop near the active site                                          | 13 |
| A. Opening of Phe <sub>70</sub> Cap                                                    | 13 |
| S4. Tyr <sub>40/42</sub> O <sup>-</sup> As Nucleophile                                 | 16 |
| A. Opening of Phe <sub>70</sub> Cap - Distance Analysis                                | 16 |
| B. Opening of Phe <sub>70</sub> Cap - Torsional Angle Analysis                         | 16 |
| C. Stability of Tyr <sub>40/42</sub> O <sup>-</sup> nucleophile generated              | 17 |
| D. Solvation around Tyr <sub>40/42</sub> O <sup>-</sup> residues                       | 20 |
| E. Solvation around Cys <sub>103/109</sub> residues                                    | 20 |
| S5. Solvent Accessible Surface Area (SASA)                                             | 22 |
| S6. Scheme for Disulfide Scission by Nucleophile                                       | 25 |
| S7. Path I: Direct Proton Transfer                                                     | 26 |
| S8. Path II: Direct Proton Transfer Followed by OH <sup>-</sup> Formation              | 29 |
| S9. Tyr <sub>42</sub> O <sup>-</sup> attack on disulfide                               | 33 |
| S10. Static Calculation on Disulfide Cleavage                                          | 33 |

|                                                                            |    |
|----------------------------------------------------------------------------|----|
| A. Static Calculation on Path IA: $S_N2$ by $\text{TyrO}^-$                | 33 |
| B. Static Calculation on Path IB: $\alpha$ -elimination by $\text{TyrO}^-$ | 34 |
| S11. Stabilization of $\text{Tyr}_{42}\text{O}^-$                          | 35 |
| S12. References                                                            | 39 |

## S1. METHODS

### A. Molecular Mechanics- Molecular Dynamics Simulations

The native structure for the 124 residue nDsbD<sub>Ox</sub> (PDB ID: 1L6P) is collected from Protein Data Bank [1], and missing atoms for Arg<sub>8</sub> and Lys<sub>73</sub> are added using PYMOL [2]. Classical Molecular Dynamics (MD) simulations are performed using GROMACS-2016.3 [3, 4]. for understanding the behaviour of the catalytic disulfide bond and its surrounding residues. Considering that 1L6P is a globular protein of size  $\approx$  6nm, the protein-water system is enclosed in a cubic box of length 8nm. Protein is then solvated with TIP3P modelled [5] 16336 water molecules and neutralized for residual charges using 10 Na<sup>+</sup> and 5 Cl<sup>-</sup> ions. Following the protocol below, the protein-water system is simulated for 400ns with 2fs time step and Amber99sb-ildn force field [6]. Periodic boundary condition is applied along the three axes and all bonds are constrained using LINCS algorithm [7]. 1.0 nm cut-off is defined for both short-range Coulomb and van der Waals interactions. Long-range electrostatic interactions are accounted using the Particle-mesh Ewald method [8, 9]. Trajectory coordinates are recorded for every 200fs, later visualized and analyzed using VMD 1.9.3 software [10]. MD simulations are also conducted on native nDsbD<sub>Ox</sub> with (i) de-protonated Tyr<sub>40</sub> and protonated Asp<sub>68</sub> (dTyr<sub>40</sub>) (ii) de-protonated Tyr<sub>42</sub> and protonated Asp<sub>68</sub> (dTyr<sub>42</sub>) in a similar fashion. As TyrO<sup>-</sup> is not a natural state for amino acid, partial charges and topology parameters are derived from tleap tool in Ambertools18 [11]. 400ns MD simulations is also performed with cDsbD<sub>Ox</sub> (PDB ID: 2FWE)[12] using the same method described as above and with the following changes; protein is enclosed in a cubic box of size 10nm, solvated with 32145 TIP3P water molecules and neutralized with 10 Na<sup>+</sup> and 4 Cl<sup>-</sup> ions.

The protocol for all MD simulations conducted here are as follows: (i) Energy minimization of the neutralized protein-water system with Steepest Descent algorithm (ii) Equilibration in NVT ensemble at 300K for 1 ns, followed by 1 ns equilibration in NPT ensemble at 1 bar pressure (iii) Final production run with V-rescale thermostat [13] and Parrinello-Rahman barostat [14] for 400ns.



## B. QM/MM Molecular Dynamics

System conformation favourable for the reactions is identified from the MD trajectory and is taken as the input for QM/MM MD simulations [15] implemented in CP2K 6.1 code [16]. The inputs are converted into CP2K readable format with tleap package of AmberTools18 [11], keeping atom positions and simulation box size intact. Topology files obtained so were corrected for solvent-protein Lennard-Jones interaction potential terms and later energetically minimized. The side chain of Tyr<sub>40</sub>, Tyr<sub>42</sub>, Asp<sub>68</sub>, Gln<sub>101</sub>, Cys<sub>103</sub>, Cys<sub>109</sub>, and the water molecules from the first solvation shell (4Å cut-off) around these residues are included in the QM region (fig. S6). These atoms are then placed inside a cubic box of length 2.6nm with a reflective wall along all the sides. QM energies are calculated based on Density Functional Theory (DFT) with Gaussian Plane Wave method (GPW) [17] (BLYP-D3 functional [18–21], DZVP basis set [22] and Goedecker-Teter-Hutter (GTH) pseudo-potential [23, 24] with 300Ry cut-off). For energy calculations on larger systems such as proteins, BLYP-D3/DZVP is on par with CCSD results [25]. Also, BLYP density functional has been earlier adopted in exploring the disulfide chemistry [26–28]. MM region for the present calculations are modelled by Amberff14SB force-field[29] and TIP3P water model. QM/MM boundary is separated with IMOMM [30] link atom approach [31, 32] with hydrogen as the linking atom. Electrostatic interaction between QM and MM region is defined using Gaussian Expansion of Electrostatic Potential (GEEP) method [33, 34]. QM/MM system is then equilibrated for 5ps with 0.5 fs time step at 300K using Nosé–Hoover thermostat chain [35, 36], in NVT ensemble.

## C. Metadynamics

Free Energy Surface (FES) for the reactions are explored with QM/MM MD metadynamics (MTD) simulations [37]. As we are looking at a rare event, MTD simulations are run in parallel with eight walkers [38]. This helps sample all possible conformation in the Collective Variable (CV) space for the reaction under study. History dependent Gaussian potential of height 0.25kcal/mol and width 0.15 is deposited with the CV every 300 steps (150fs). Here, CV is defined as the difference in coordination number ( $\Delta CN(O_a, O_d, H)$ ) for acceptor ( $O_a$ )

and donor ( $O_d$ ) oxygen atom, with respect to the hydrogen atom which is being transported (eq. (S2)).

$$CV = \Delta CN(O_a, O_d, H) = CN(O_a, H) - CN(O_d, H) \quad (\text{S1})$$

$CN(O_d, H)$  and  $CN(O_a, H)$  are calculated using eq. (S2).

$$CN(O, H) = \frac{1 - \left(\frac{d_{OH}}{d_0}\right)^6}{1 - \left(\frac{d_{OH}}{d_0}\right)^{12}} \quad (\text{S2})$$

where ' $d_{OH}$ ' is the distance between oxygen and hydrogen atom; ' $d_0$ ' is the equilibrium bond length between the respective atoms, taken here as 0.98 Å. If the proton is located near the acceptor, then the CV ( $\Delta CN(O_a, O_d, H)$ ) will have a positive value otherwise negative. Thus, a value close to 0.45 of any CV is considered the product state along that CV.

#### D. DFT Calculations

Energetics for static gas-phase nucleophile mediated disulfide cleavage reaction was computed using BLYP-D3/6-31G\* [18–21, 39] in ORCA quantum chemistry program suite [40]. Tyr<sub>42</sub>O<sup>-</sup>, Cys<sub>103/109</sub> residues as defined in the QM region only are incorporated for the study. The inputs for the calculation is collected from the Tyr<sub>42</sub>O<sup>-</sup>-Cys<sub>103</sub>C<sub>α</sub>H distance scan performed using the QM/MM implementation in Gromacs 2016.3-ORCA combined program. Valency for carbon is satisfied using hydrogen atoms. The reactants and products are optimized within extreme tight SCF convergence criteria. The transition state was confirmed from the imaginary frequency.

## S2. NUCLEOPHILE GENERATING RESIDUES NEAR THE ACTIVE SITE

### A. Proton Transfer From Tyr<sub>40/42/71</sub> OH To Asp<sub>68</sub>O<sup>-</sup>

The active site in nDsbD<sub>Ox</sub> is surrounded by amino acid residues such as Tyr<sub>40</sub>, Tyr<sub>42</sub>, Asp<sub>68</sub> and Tyr<sub>71</sub>, whose side chain can act as potential nucleophile generators (fig. S1). Here, (TyrO<sup>-</sup>) nucleophile can be generated through proton abstraction by Asp<sub>68</sub> from any of the above tyrosine residues.

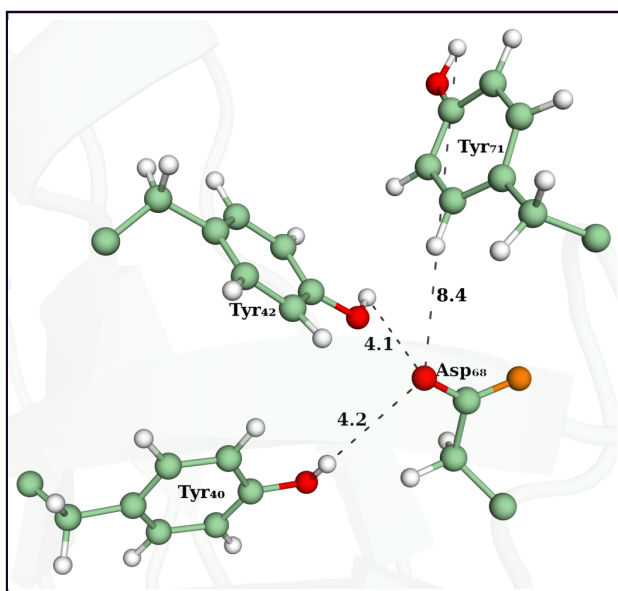

FIG. S1: Possible nucleophile generating residues near the disulfide bond of nDsbD<sub>Ox</sub>. For identification, one of the Asp<sub>68</sub> oxygen is coloured orange.

### B. Distance between Asp<sub>68</sub>O<sup>-</sup> and Tyr<sub>40/42</sub>OH

Possibilities of proton abstraction by Asp<sub>68</sub> from Tyr<sub>40/42</sub> to form TyrO<sup>-</sup> nucleophile is analyzed here. For this, the evolution of distance with time and corresponding normalized distributions are plotted (figs. S2 and S3). Based on the simulations, distance analysis between the residues are separated into two sections (i) 0 - 150ns and (ii) 150-400ns. The majority of the time up to 150ns, as both Tyr<sub>40/42</sub> residues are far away from Asp<sub>68</sub>, there is no significant hydrogen bond interaction. Thus in the distribution plot (fig. S3a) major peak

is due to 4-8Å distance. In rare cases, Asp<sub>68</sub> comes closer only to Tyr<sub>40</sub> (t=60ns, fig. S2a). After 150ns, it can be seen that both oxygen's of Asp<sub>68</sub> forms a hydrogen bond to Tyr<sub>42</sub>; the trend being retained for ≈25ns and repeated over time. Nevertheless, at ≈200ns, Tyr<sub>40</sub> and Tyr<sub>42</sub> together share hydrogen bond interactions with Asp<sub>68</sub>. The same can be interpreted from the distribution as well. The dominant peak at ≈2Å comes from Tyr<sub>42</sub>OH - Asp<sub>68</sub>O<sup>-</sup>, whereas Tyr<sub>40</sub>-Asp<sub>68</sub> distance contributes only one-third of the area (fig. S3b). Thus, it can be concluded that near the active site of nDsbD<sub>Ox</sub>, strong hydrogen bond interaction exists between the side chains of Tyr<sub>42</sub>-Asp<sub>68</sub> residues and proton abstraction from Tyr<sub>42</sub> by Asp<sub>68</sub>, can generate TyrO<sup>-</sup> nucleophile. Tyr<sub>40</sub> also has a minor contribution towards the formation of TyrO<sup>-</sup>, but the possibilities are minimal. Hence, our MD simulation results for the Phe<sub>70</sub> cap fluctuations, together with the proton transfer direct towards the exploration of possibilities and energetics involved in forming nucleophile (TyrO<sup>-</sup>), which may further lead to disulfide scission.

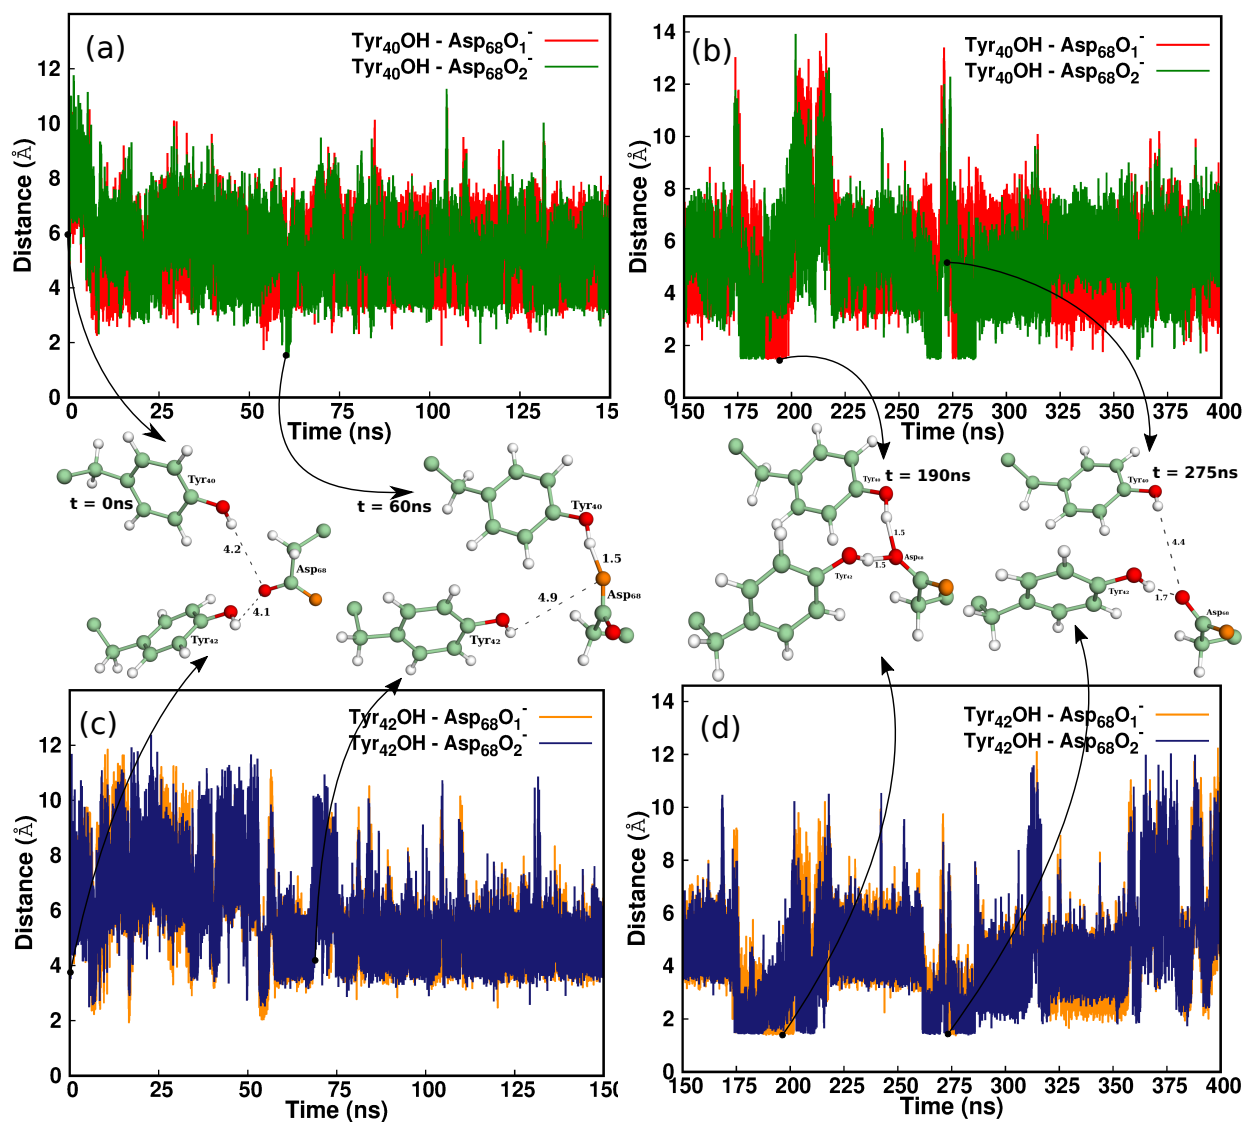

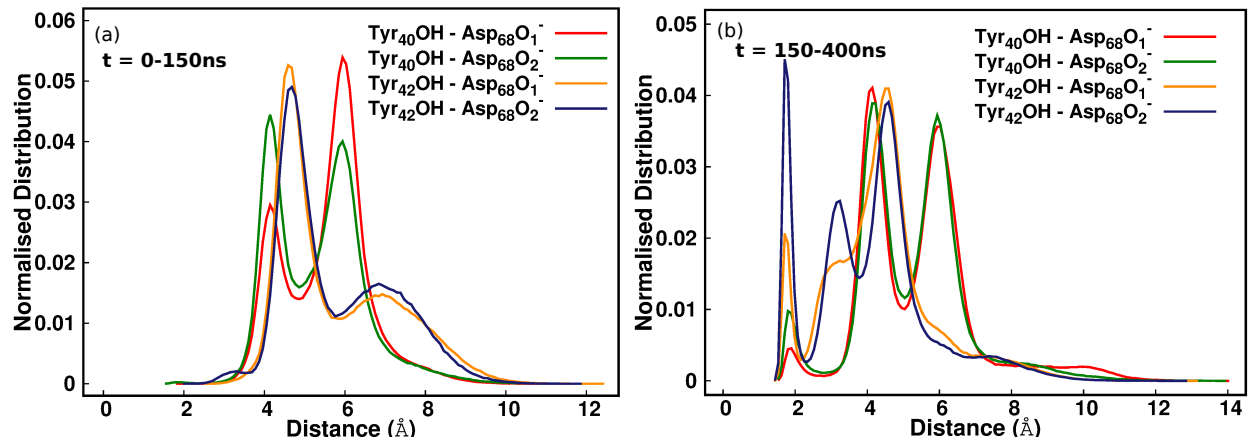

FIG. S3: Normalized distribution for the distance between Tyr<sub>40/42</sub> and Asp<sub>68</sub> separated into two-time sections; (a) 0-150ns and (b) 150-400ns.

### C. Distance between $\text{Asp}_{68}\text{O}^-$ and $\text{Tyr}_{71}\text{OH}$

$\text{Tyr}_{71}$  can transfer its proton to  $\text{Asp}_{68}$  and generate  $\text{Tyr}_{71}\text{O}^-$  nucleophile. So, the distance between the residues is plotted to determine whether  $\text{Tyr}_{71}$  can be a potential nucleophile generating residue (fig. S4). As seen from the plot, these residues approach down to  $\approx 4\text{\AA}$  only. The formation of  $\text{TyrO}^-$  by the proton transfer between  $\text{Tyr}_{71}$  and  $\text{Asp}_{68}$  is very rare, and therefore, for further investigations,  $\text{Tyr}_{71}$  is excluded from the QM region.

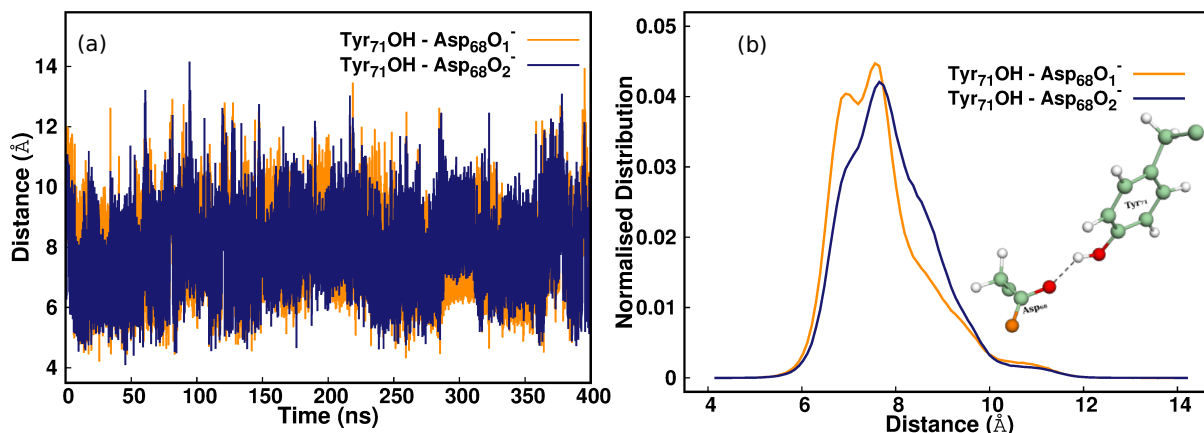

FIG. S4: (a) Time evolution for the distance between  $\text{Tyr}_{71}\text{OH}$  and  $\text{Asp}_{68}\text{O}_{1/2}^-$  and (b) corresponding normalized distribution. As can be seen,  $\text{Asp}_{68}\text{O}^-$  is far away from  $\text{Tyr}_{71}\text{OH}$  for proton abstraction, and so  $\text{Tyr}_{71}\text{O}^-$  nucleophile is not a possibility.

### D. $\text{Asp}_{68}\text{O}^-$ as a nucleophile

Chances of direct attack by  $\text{Asp}_{68}$  as a nucleophile in breaking the disulfide bond is also examined (fig. S5). As the closest distance between  $\text{Asp}_{68}$  and  $\text{Cys}_{103}\text{S}$  is  $\approx 4\text{\AA}$ , chances of  $\text{Asp}_{68}$  to perform a direct attack on  $\text{Cys}_{103}$  and break the disulfide bond can be ruled out.

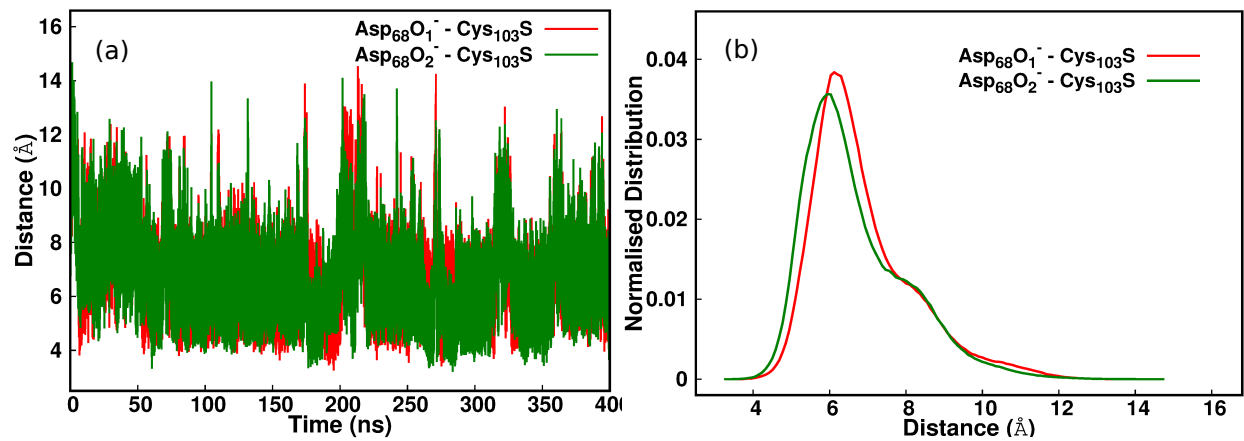

FIG. S5: (a) Time evolution for the distance between Cys<sub>103</sub>S and Asp<sub>68</sub> (b) Corresponding normalized distribution. Possibilities for Asp<sub>68</sub> to attack the disulfide bond is minimal here.



### E. Defining QM region

Residues, as shown in fig. S6 in native nDsbD<sub>Ox</sub> and ten water molecules from the first solvation shell (4Å cut-off) are incorporated in the QM region. The boundary between the QM and MM region is separated using hydrogen atoms, and at most care has been given to place hydrogen between C–C single bond. Same residues are included when defining the QM region in dTyr<sub>42</sub>, together with thirteen water molecules from the first solvation shell.

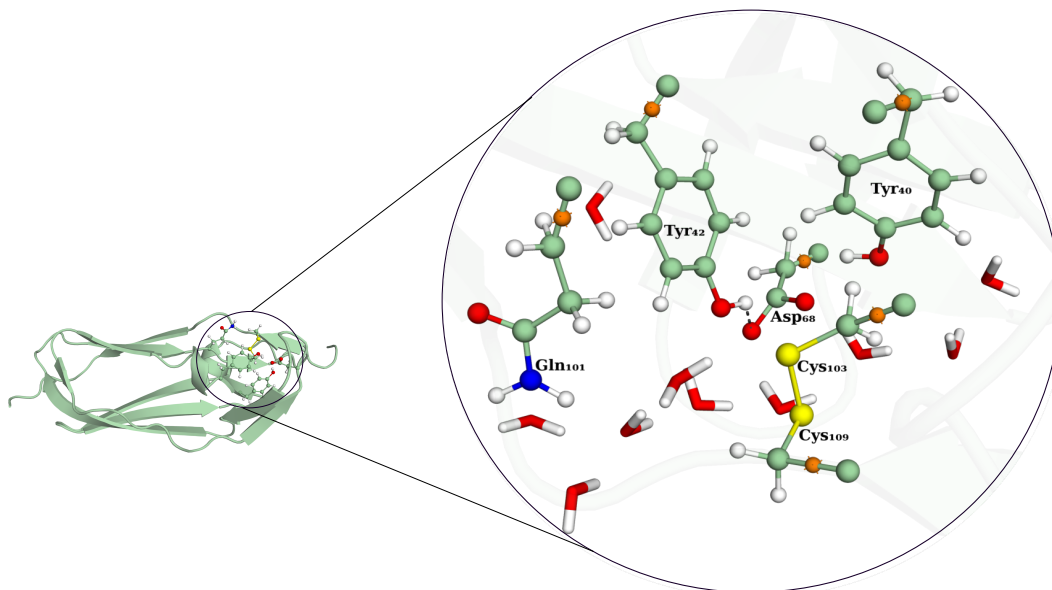

FIG. S6: Native structure of nDsbD<sub>Ox</sub> (left) (PDB ID: 1L6P). Enlarged on the right are the residues along with ten water molecules included in the QM region. Link atoms separating the boundary between QM and MM are shown as orange balls.

## S3. PRESENCE OF CAP-LOOP NEAR THE ACTIVE SITE

### A. Opening of Phe<sub>70</sub> Cap

The active site (including Cys<sub>103</sub>- Cys<sub>109</sub> disulfide bond) is enclosed in a cap loop made up of Asp<sub>68</sub>- Glu<sub>69</sub> - Phe<sub>70</sub> - Tyr<sub>71</sub> - Gly<sub>72</sub> - Lys<sub>73</sub> residues [41–43]. Among the loop residues, Phe<sub>70</sub> forms a cap to Cys<sub>109</sub> and protects the disulfide from nucleophilic and solvent attack [43]. Conformational changes in the cap loop region have a key role in the flexibility of

nDsbD<sub>Ox</sub> and its function [44]. The change from a closed to open conformation for Phe<sub>70</sub> cap can be characterized by the distance from the centre of mass of Phe<sub>70</sub> ring to the sulphur of Cys<sub>103</sub> ( $d_{Phe70-Cys103}$ ) and Cys<sub>109</sub>S ( $d_{Phe70-Cys109}$ ). If  $d_{Phe70-Cys109}$  is less than 5Å, the cap is considered closed conformation or else open. [44] X-ray structure for nDsbD<sub>Ox</sub> holds Phe<sub>70</sub> cap in a closed conformation (distance=3.5Å). Nevertheless, our simulations show a fluctuating behaviour for the cap, in which during the majority of simulation time cap remains in the open state. It is visible from (i) time evolution plot for ( $d_{Phe70-Cys103/109}$ ) distance (fig. S7a) (ii) normalized distribution plot for the same (fig. S7b). Snapshots at different time frames demonstrating Phe<sub>70</sub> cap opening are also included here fig. S8.

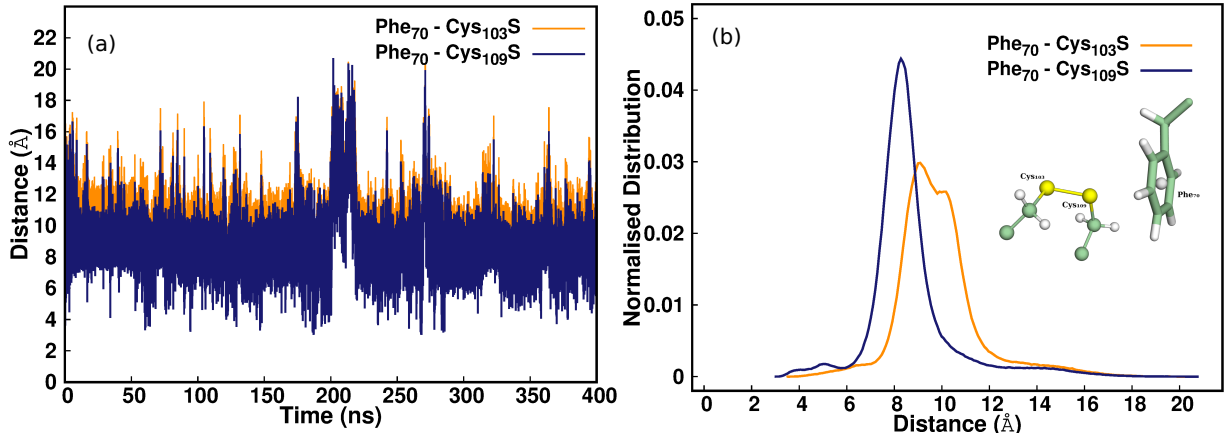

FIG. S7: Fluctuation of Phe<sub>70</sub> cap with respect to Cys<sub>103/109</sub>S distance. (a) Time evolution for the distance (b) Corresponding normalized distribution plot. It is clear that Phe<sub>70</sub> cap moves from a closed to open conformation during the simulation.

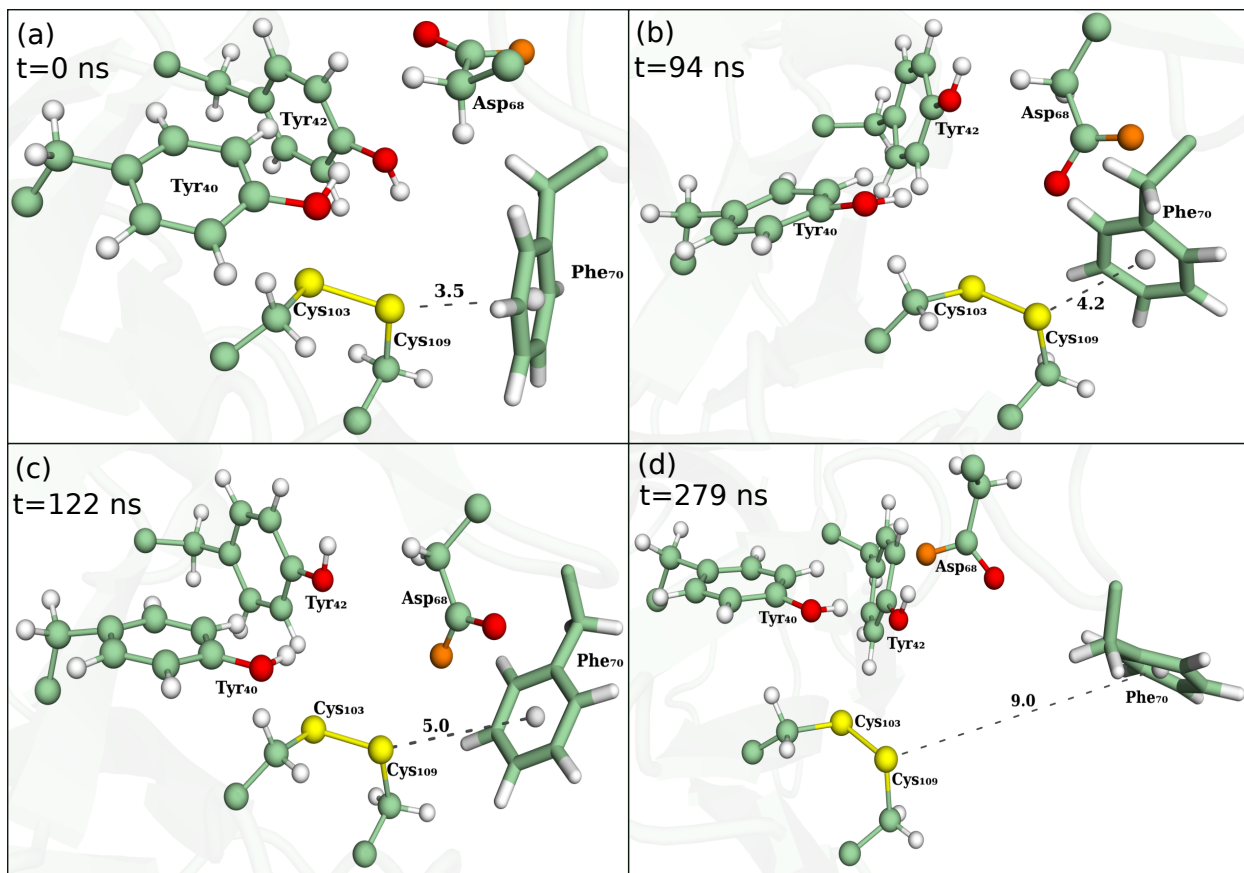

FIG. S8: Snapshots at different time frames from MD simulation showing Phe<sub>70</sub> Cap opening.

#### S4. TYR<sub>40/42</sub>O<sup>-</sup> AS NUCLEOPHILE

MD simulations indicate the possibility of proton abstraction by Asp<sub>68</sub> from Tyr<sub>40/42</sub> residues to form TyrO<sup>-</sup> nucleophile. The fate of these nucleophiles after their formation is analyzed. For this, MD simulations are conducted on dTyr<sub>40</sub> and dTyr<sub>42</sub>. Following are the observations from the MD data.

##### A. Opening of Phe<sub>70</sub> Cap - Distance Analysis

Based on the distance cut-off for Phe<sub>70</sub> - Cys<sub>109</sub> in section S3, the cap's opening is evaluated in dTyr<sub>40</sub>, dTyr<sub>42</sub> systems fig. S9. It is clear that Phe<sub>70</sub> cap is flexible for dTyr<sub>42</sub>(blue), similar to native nDsbD<sub>Ox</sub> (green), but remains closed for dTyr<sub>40</sub> (red).

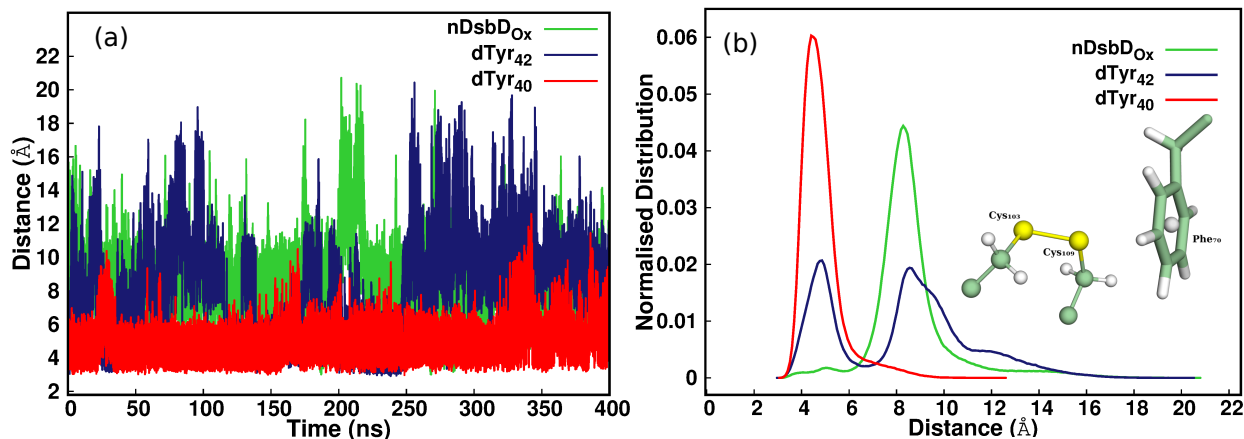

FIG. S9: (a) Variation in Phe<sub>70</sub> cap - Cys<sub>109</sub> distance with time for nDsbD<sub>Ox</sub>(green), dTyr<sub>42</sub> (blue) and dTyr<sub>40</sub>(red) systems (b) Corresponding normalized distribution. When the distance is less than 5Å, which indicates a closed Phe<sub>70</sub> cap conformation.

##### B. Opening of Phe<sub>70</sub> Cap - Torsional Angle Analysis

To measure the presence of local frustration near the active site,  $\chi_1$  torsional angle (N-CA-CB-SG) for Cys<sub>103/109</sub> are measured (fig. S10).  $\chi_1$  in gauche ( $\approx 60^\circ$ ) suggests that Cys<sub>103/109</sub> of both dTyr<sub>40</sub> and dTyr<sub>42</sub> maintain local frustration like the disulfide of

nDsbD<sub>Ox</sub>.

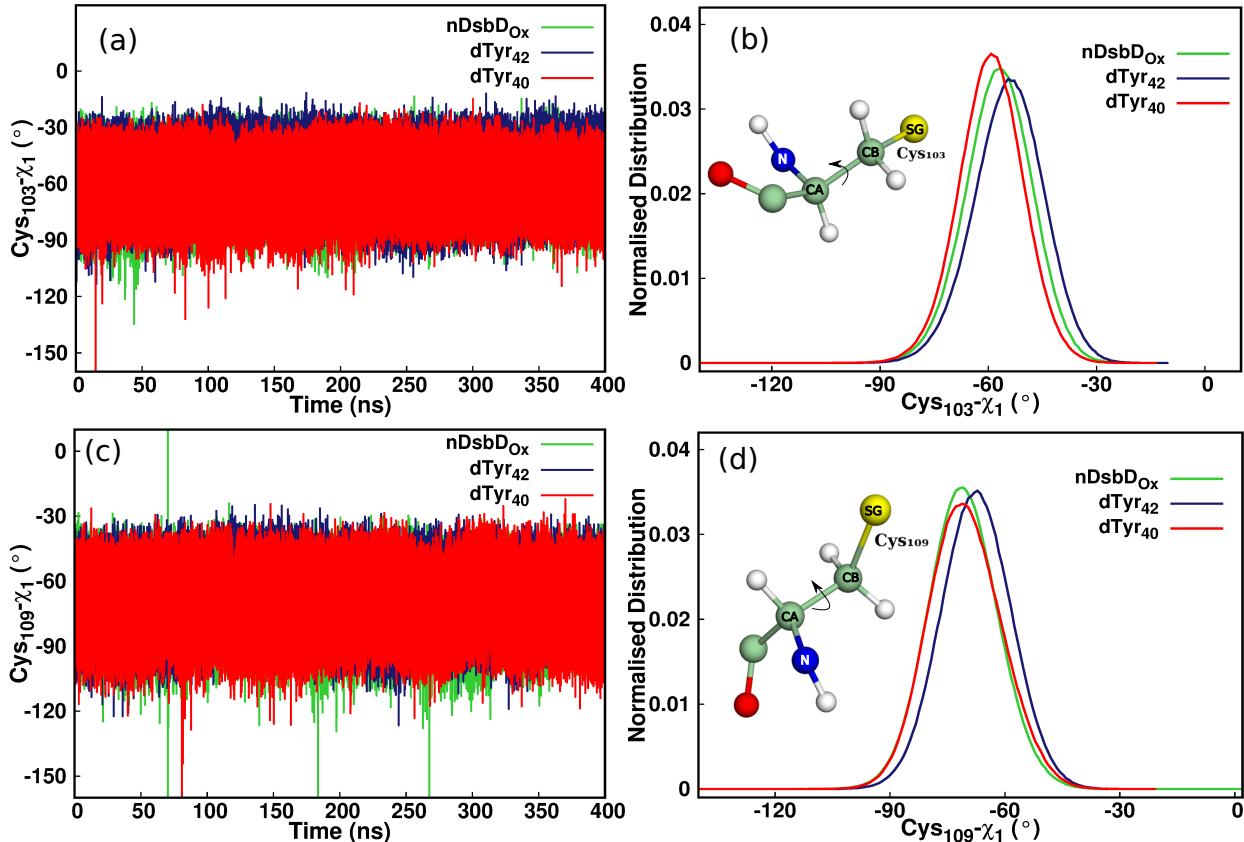

FIG. S10: (a)  $\chi_1$  torsional angle and (b) corresponding normalized distribution for Cys<sub>103</sub> (c)  $\chi_1$  torsional angle and (d) corresponding normalized distribution for Cys<sub>109</sub> in nDsbD<sub>Ox</sub>, dTyr<sub>40</sub> and dTyr<sub>42</sub>. Values at  $\approx 60^\circ$  and  $\approx 180^\circ$  refer to gauche, trans conformations respectively.

$\chi_1$  torsional angle (N-CA-CB-CG) in Phe<sub>70</sub> is measured (fig. S11). Dominant peak at  $\approx 180^\circ$  (trans)  $\chi_1$  for nDsbD<sub>Ox</sub> shows a completely open cap, while the presence of two equal peaks at  $\approx 60^\circ$  (gauche),  $\approx 180^\circ$  (trans) for dTyr<sub>40</sub>, dTyr<sub>42</sub> indicate flexible cap.

### C. Stability of Tyr<sub>40/42</sub>O<sup>-</sup> nucleophile generated

Now that the formation of Tyr<sub>40/42</sub>O<sup>-</sup> are possible, their fate as a nucleophile is explored. In the case of Tyr<sub>40</sub>O<sup>-</sup>, it always stays near the proximity of Asp<sub>68</sub>OH, increasing the chances

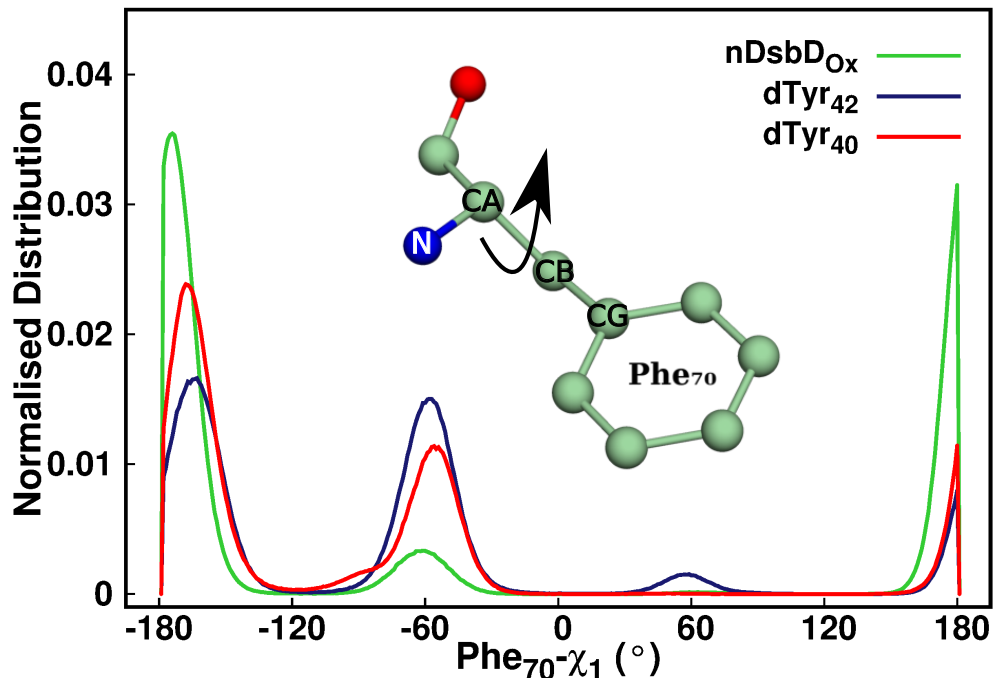

FIG. S11:  $\chi_1$  torsional angle for Phe<sub>70</sub> in nDsbD<sub>Ox</sub>, dTyr<sub>40</sub> and dTyr<sub>42</sub>. Values at  $\approx 60^\circ$  and  $\approx 180^\circ$  refers to gauche, trans conformations, respectively.

of reverse proton transfer and destabilizing the nucleophile (fig. S12a). At the same time, Tyr<sub>42</sub>O<sup>-</sup> drifts away from Asp<sub>68</sub>OH. As a result, proton shuttling between the two residues is hindered, causing so formed Tyr<sub>42</sub>O<sup>-</sup> to stabilize through other means. It is seen that Tyr<sub>42</sub>O<sup>-</sup> approaches Tyr<sub>40</sub>OH for hydrogen bond interaction, but as seen from fig. S12b, happens very few times during the simulation. Thus, Tyr<sub>40</sub>O<sup>-</sup> is minimal, whereas the drifted Tyr<sub>42</sub>O<sup>-</sup> can be stabilized either by hydrogen bonding interactions with Tyr<sub>40</sub>OH or through the solvent medium.

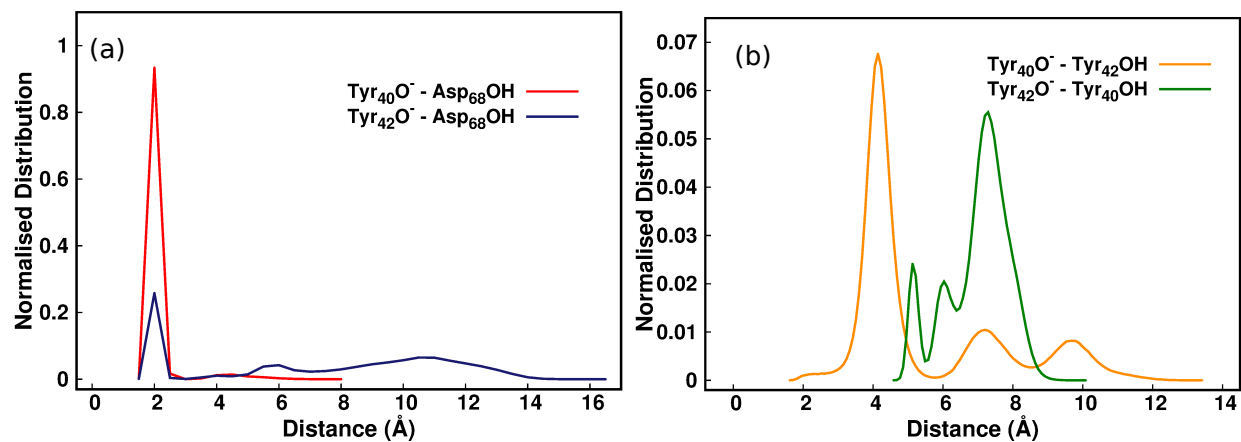

FIG. S12: (a) Distance between  $\text{Tyr}_{40}\text{O}^-$  -  $\text{Asp}_{68}\text{OH}$  and  $\text{Tyr}_{42}\text{O}^-$  -  $\text{Asp}_{68}\text{OH}$ . A strong hydrogen bond interaction between  $\text{Tyr}_{40}\text{O}^-$  -  $\text{Asp}_{68}\text{OH}$  points towards reverse proton transfer.  $\text{Tyr}_{42}\text{O}^-$  comes closer to  $\text{Asp}_{68}\text{OH}$ , but flies away later. (b) Distance between  $\text{Tyr}_{40}\text{O}^-$  -  $\text{Tyr}_{42}$  and  $\text{Tyr}_{42}\text{O}^-$  -  $\text{Tyr}_{40}$ .

### D. Solvation around Tyr<sub>40/42</sub>O<sup>-</sup> residues

Since the opening of the Phe<sub>70</sub> cap increases the solvation around the active site and nearby residues,[41, 42] chances of Tyr<sub>42</sub>O<sup>-</sup> through water is studied. For this, no. of water molecules (cut-off distance 4Å ) for the respective residues in are compared with that of the native protein (fig. S13). Tyr<sub>42</sub> is comparatively more solvated, increasing the chances of Tyr<sub>42</sub>O<sup>-</sup> stabilization through the surrounding water medium.

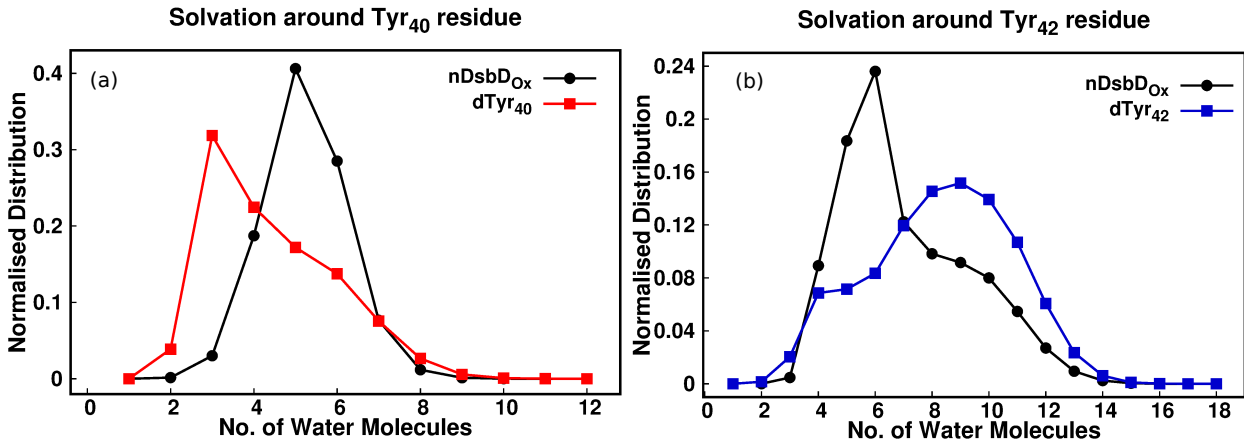

FIG. S13: No. of water molecules around (a) Tyr<sub>40</sub> in nDsbD<sub>Ox</sub> and dTyr<sub>40</sub> (b) Tyr<sub>42</sub> in nDsbD<sub>Ox</sub> and dTyr<sub>42</sub>. Here water molecules from the first solvation shell (4Å distance) are only counted. It is well clear that Tyr<sub>42</sub> is comparatively well solvated.

### E. Solvation around Cys<sub>103/109</sub> residues

No. of water molecules around Cys<sub>103/109</sub> from first solvation shell (4Å distance) is counted fig. S14. It is well clear that Cys<sub>109</sub> is more solvated than Cys<sub>103</sub> as the later residue is buried inside the cap loop. Solvation around the disulfide is least for dTyr<sub>40</sub> compared to dTyr<sub>42</sub> and nDsbD<sub>Ox</sub>, and this is expected as the Phe<sub>70</sub> cap is in a closed state. The disulfide is maximally solvated in native nDsbD<sub>Ox</sub>, which shows the highest cap opening events rate. The cap flexibility affects the solvation around the disulfide bond.



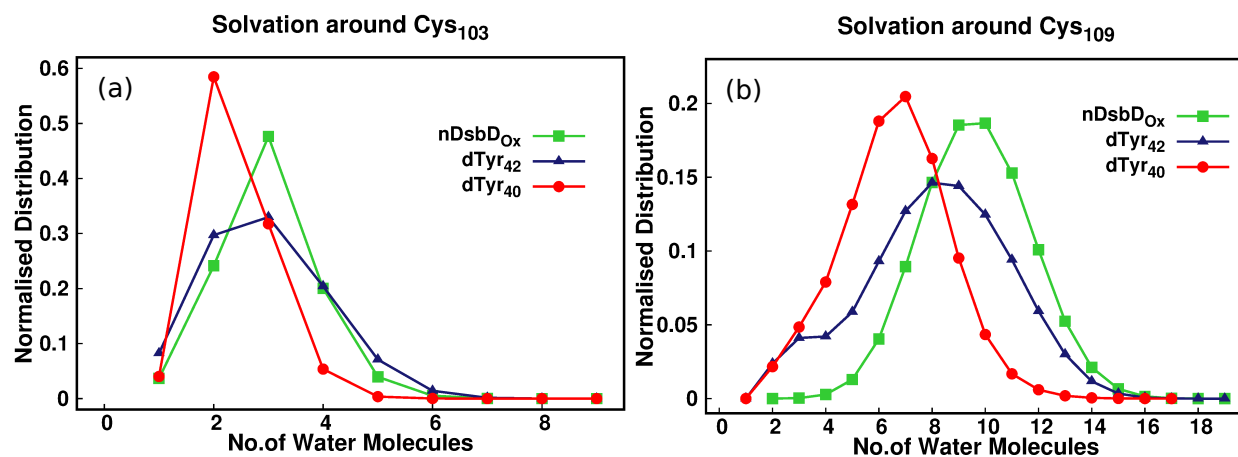

FIG. S14: No. of water molecules around (a) Cys<sub>103</sub> (b) Cys<sub>109</sub> in nDsbD<sub>Ox</sub>, dTyr<sub>40</sub> and dTyr<sub>42</sub>. Here water molecules within 4Å distance is only counted. It is well clear that Cys<sub>109</sub> is highly solvated than Cys<sub>103</sub>.

## S5. SOLVENT ACCESSIBLE SURFACE AREA (SASA)

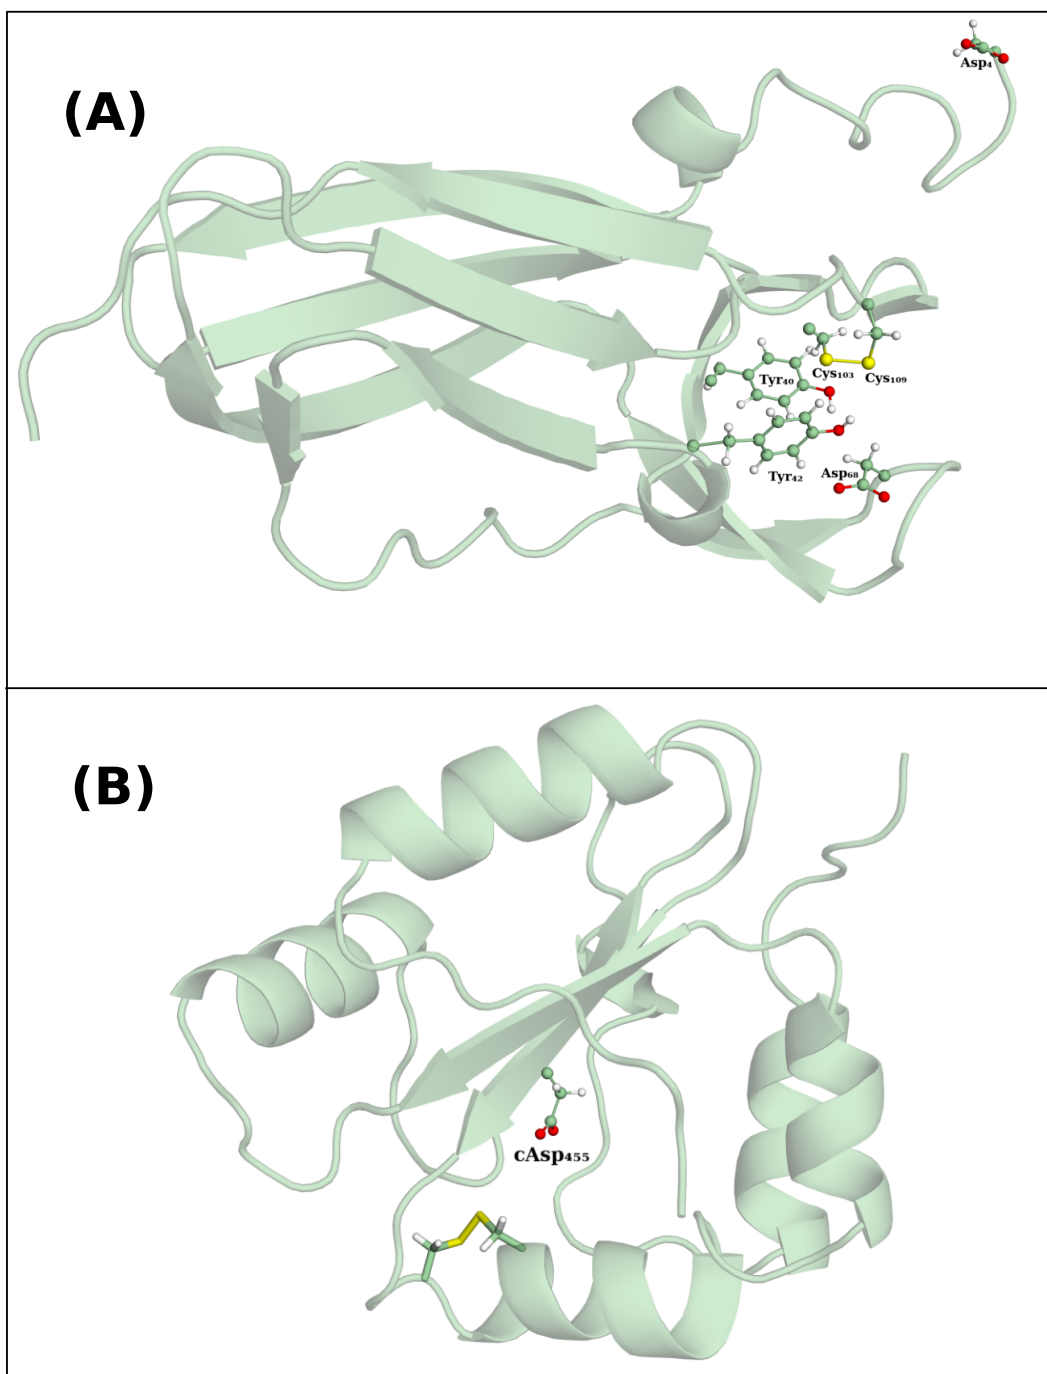

FIG. S15: Residues for which pKa values calculated for (A) Asp<sub>4/68</sub>, Tyr<sub>40/42</sub> and Cys<sub>103/109</sub> in nDsbD<sub>Ox</sub> (Oxidised N-terminal DsbD) and (B) cAsp<sub>455</sub> in cDsbD<sub>Ox</sub> (Oxidised C-terminal DsbD)

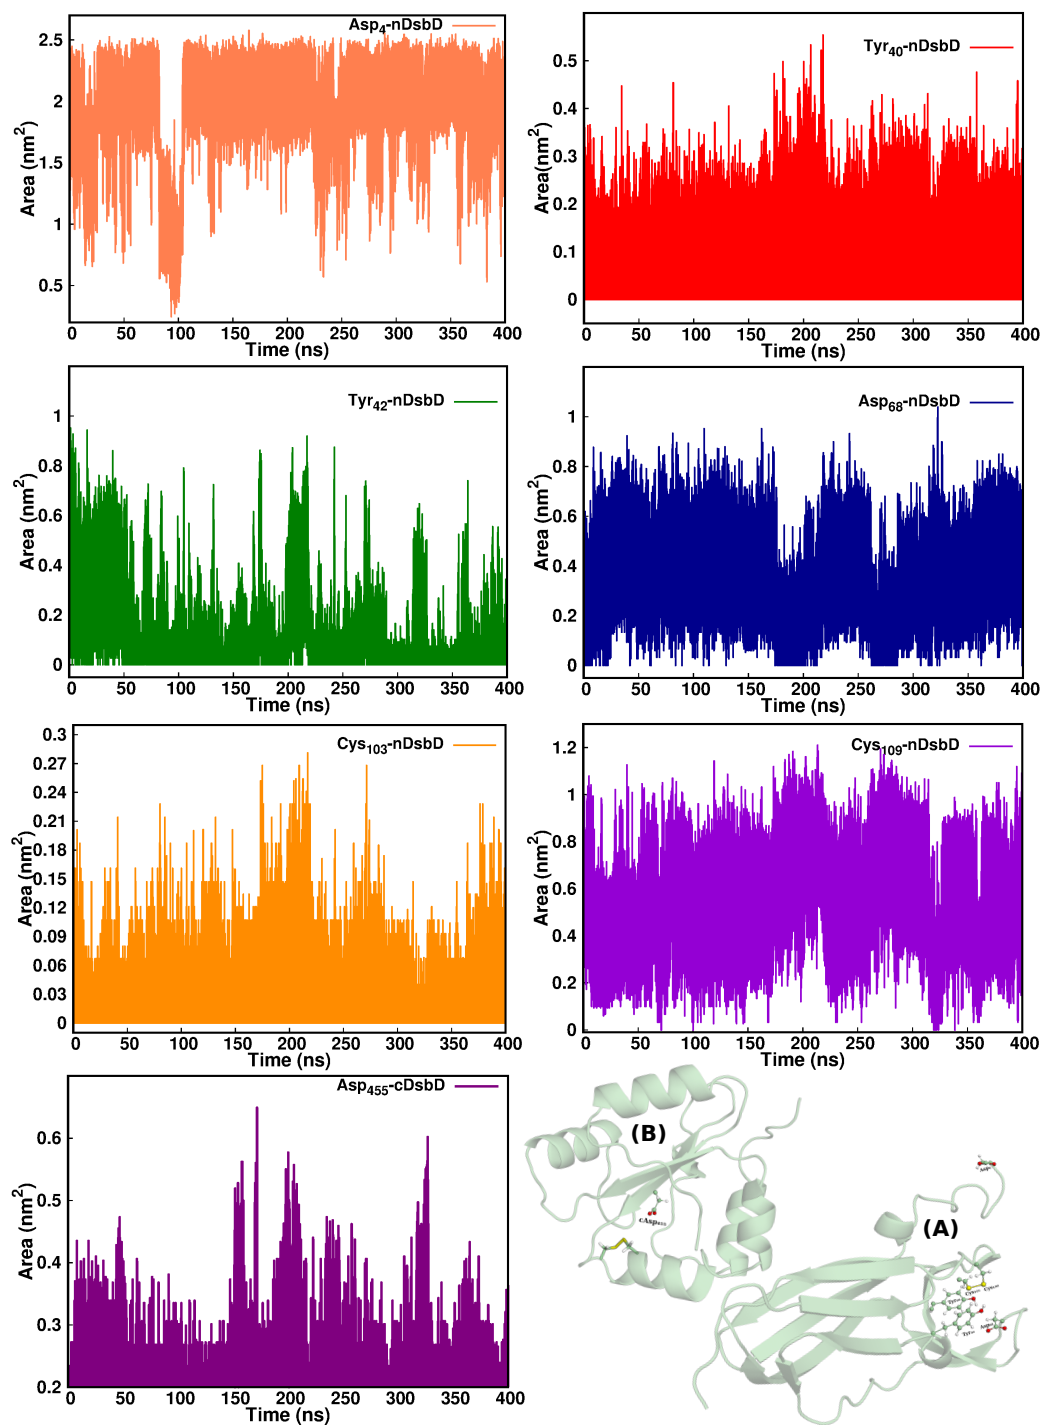

FIG. S16: Evolution of Solvent accessible surface area (SASA) with time calculated for residues Asp<sub>4/68</sub>, Tyr<sub>40/42</sub> and Cys<sub>103/109</sub> in nDsbD<sub>Ox</sub> (A) and cAsp<sub>455</sub> in cDsbD<sub>Ox</sub> (B). Comparison with deeply buried cAsp<sub>455</sub> clearly shows that Tyr<sub>40/42</sub>, Cys<sub>103</sub> are deeply buried while Asp<sub>68</sub> is partially buried in nDsbD<sub>Ox</sub>.

| SASA for Residues |         |                                    |              |            |             |                                     |
|-------------------|---------|------------------------------------|--------------|------------|-------------|-------------------------------------|
| Protein           | Residue | SASA Calculated ( $\text{\AA}^2$ ) |              |            |             | Nature of the residue from Exp.[45] |
|                   |         | CIB-server[46]                     | PDBePISA[47] | STRIDE[48] | GETAREA[49] |                                     |
| 1RGG [50]         | Asp1    | 146.63                             | 141.53       | 161.70     | 145.70      | Exposed                             |
|                   | Asp17   | 82.47                              | 83.35        | 93.10      | 81.82       | Exposed                             |
|                   | Asp79   | 12.55                              | 12.83        | 15.80      | 13.07       | Buried                              |
|                   | Asp84   | 64.26                              | 60.67        | 62.90      | 63.63       | Exposed                             |
| 6LYZ [51]         | Asp18   | 50.44                              | 52.19        | 61.70      | 50.65       | Exposed                             |
|                   | Asp48   | 85.74                              | 83.12        | 81.30      | 83.82       | Exposed                             |
| 1XQ8 [52]         | Asp2    | 88.47                              | NA           | 107.30     | 88.50       | Exposed                             |
|                   | Asp98   | 132.50                             | NA           | 153.80     | 132.93      | Exposed                             |
| 1UBQ [53]         | Asp32   | 127.98                             | 129.22       | 147.00     | 127.58      | Exposed                             |
|                   | Asp39   | 82.71                              | 81.38        | 85.30      | 82.30       | Exposed                             |
|                   | Asp58   | 84.52                              | 85.30        | 91.30      | 83.55       | Exposed                             |
| 1QKP[54, 55]      | Asp96   | 0.00                               | 0.00         | 0.40       | 0.00        | Buried                              |
| 4KQ8              | Asp309  | 8.08                               | 14.61        | 9.70       | 10.70       | Buried                              |
| 1XOA[56]          | Asp26   | 0.00                               | NA           | 0.00       | 0.00        | Buried                              |
| 2FWE2FWE[57]      | Asp455  | 4.70                               | 7.40         | 4.00       | 5.55        | Buried                              |
| 1L6P              | Asp4    | 161.63                             | 164.83       | 179.10     | 161.05      | NA                                  |
|                   | Tyr40   | 3.16                               | 4.33         | 4.60       | 3.30        | NA                                  |
|                   | Tyr42   | 3.71                               | 5.70         | 3.80       | 3.38        | NA                                  |
|                   | Asp68   | 14.69                              | 14.97        | 7.40       | 15.51       | NA                                  |
|                   | Cys103  | 0.11                               | 0.34         | 0.20       | 0.12        | NA                                  |
|                   | Cys109  | 31.89                              | 32.31        | 31.00      | 30.84       | NA                                  |

TABLE S1: Comparison of SASA for buried and exposed residues in different proteins and nDsbD<sub>Ox</sub>, calculated using available web-servers. Nature of the residues as obtained from the experiments are also included.[45] It can be seen that buried residues are having lower SASA values and hence their pKa is expected to be higher than the normal range.[58, 59] For nDsbD<sub>Ox</sub>, there are no available experimental data, but SASA predicts an abnormally

higher pKa for Asp<sub>68</sub>, Tyr<sub>40/42</sub> and Cys<sub>103/109</sub> residues.

## S6. SCHEME FOR DISULFIDE SCISSION BY NUCLEophile

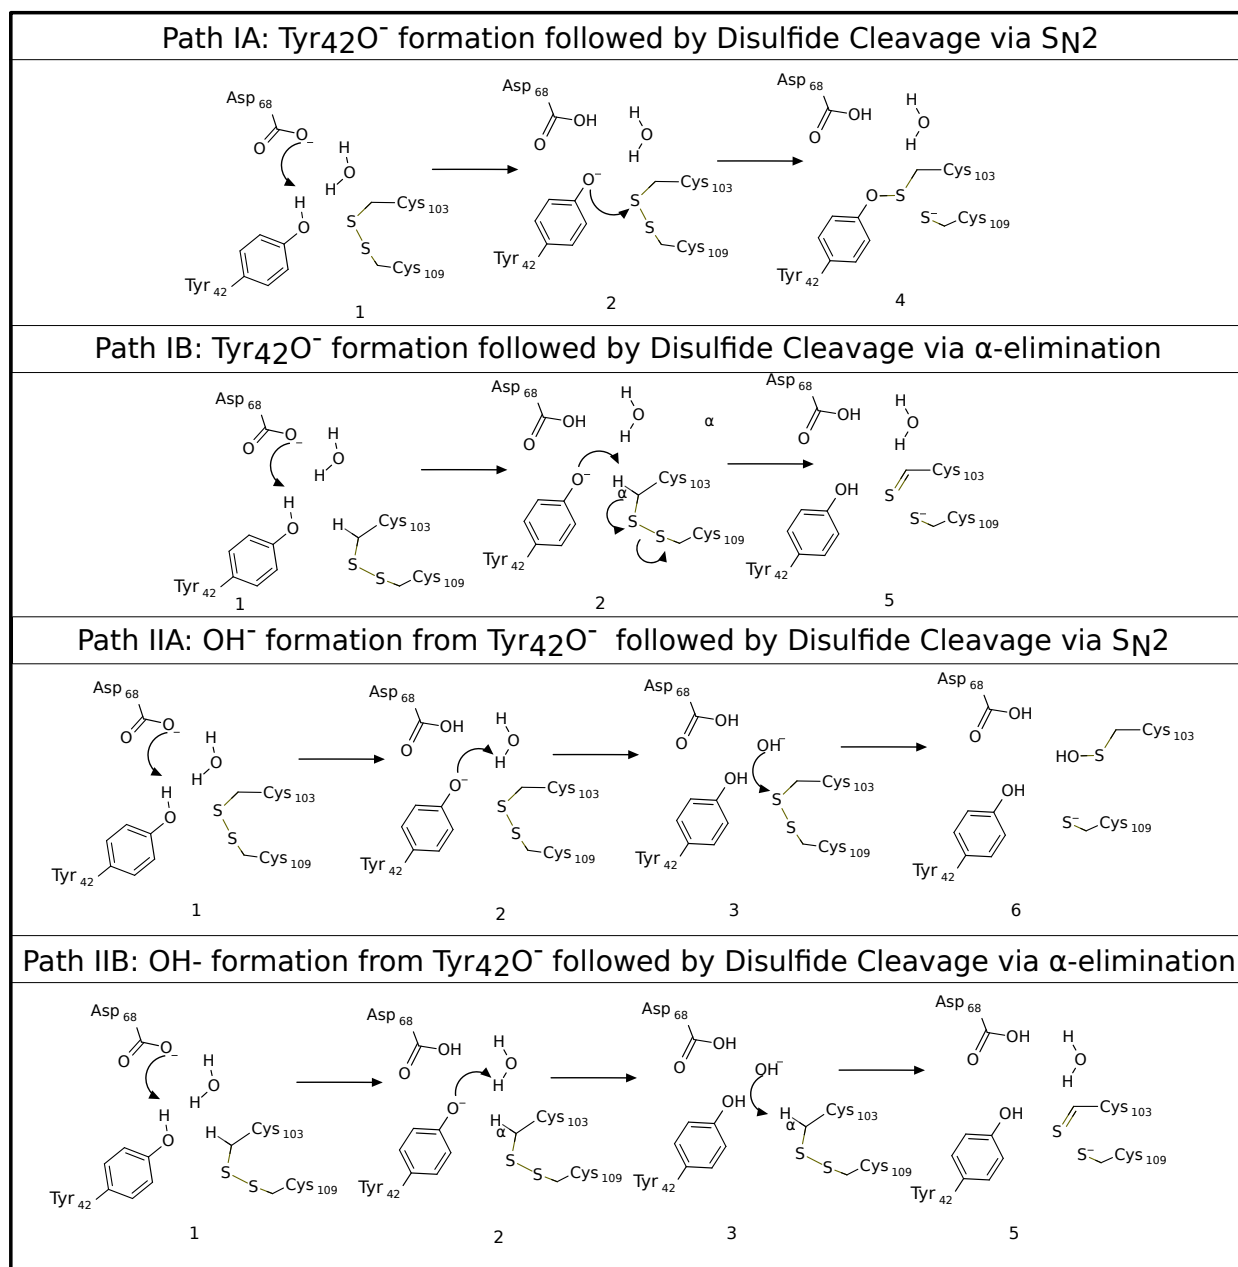

FIG. S17: Scheme for the disulfide cleavage by the nucleophile. Path IA: Tyr<sub>42</sub>O<sup>-</sup> formation followed by S<sub>N</sub><sup>2</sup> mechanism. Path IB: Tyr<sub>42</sub>O<sup>-</sup> formation followed by  $\alpha$ -elimination. Path IIA: OH<sup>-</sup> formation followed by S<sub>N</sub><sup>2</sup> mechanism. Path IIB: OH<sup>-</sup> formation followed by  $\alpha$ -elimination.

### S7. PATH I: DIRECT PROTON TRANSFER

The nucleophile  $\text{Tyr}_{42}\text{O}^-$  can be generated by the direct proton transfer from  $\text{Tyr}_{42}$  to  $\text{Asp}_{68}$  (fig. S18A). As both oxygen atoms of  $\text{Asp}_{68}$  can capture a proton from  $\text{Tyr}_{42}$ , these possibilities are included in the CV definition (fig. S18B). CV values expected for reactant and products are shown in fig. S19.

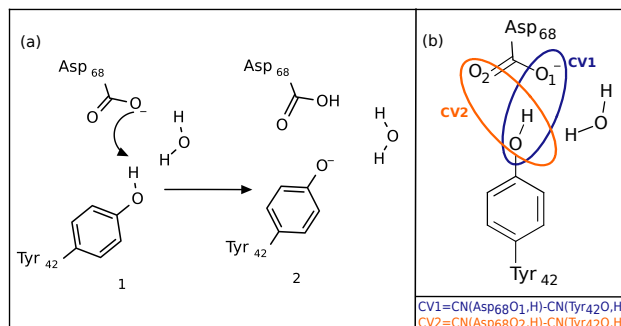

FIG. S18: (a) Reaction scheme for Path I: direct proton transfer (b) Corresponding definition for CV. Encircled in blue and orange are those atoms included in CV1 and CV2 respectively.

| CV1  | CV2  | Structure |
|------|------|-----------|
| -0.5 | -0.5 |           |
| +0.5 | -0.5 |           |
| -0.5 | +0.5 |           |

FIG. S19: CV values and the corresponding states expected during QM/MM MTD on Path I.

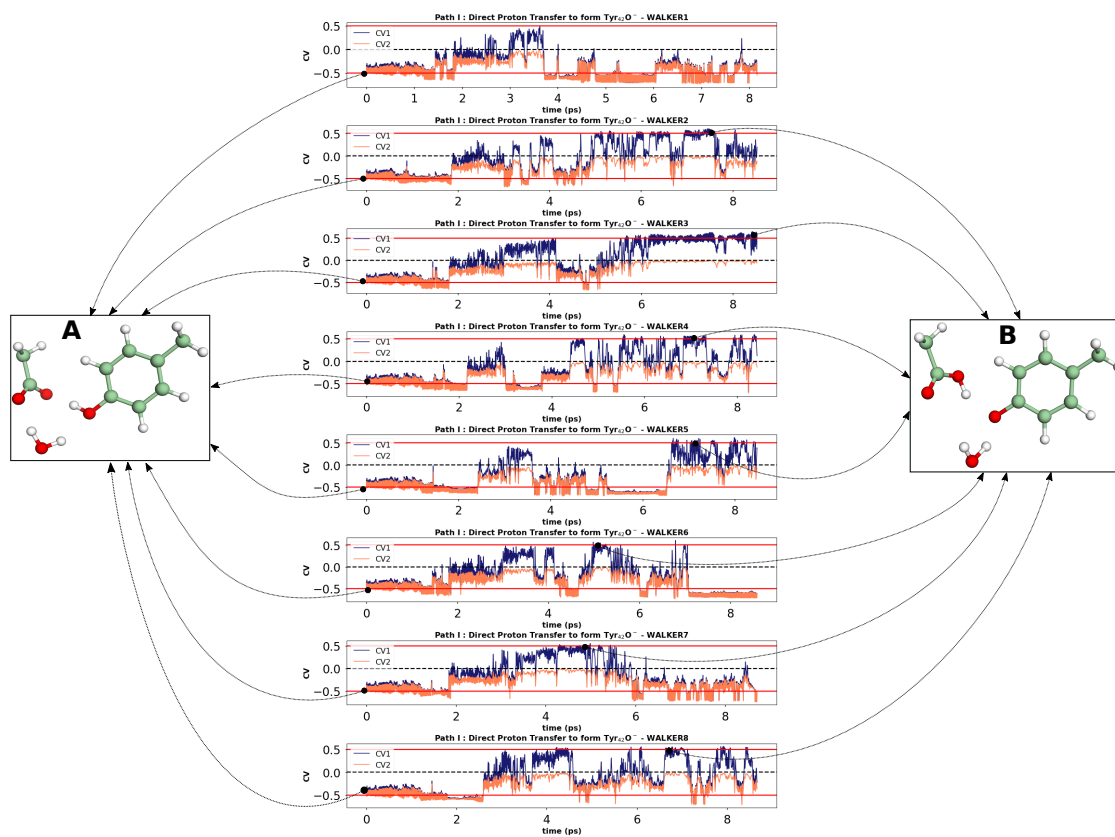

FIG. S20: Evolution of CV with time for Path I. CV1 and CV2 are shown as blue and orange lines, respectively. Images given in the inset are for the reactant (A) and the product (B) state. Formation of  $\text{Tyr}_{42}\text{O}^-$  can be visualized along CV1.

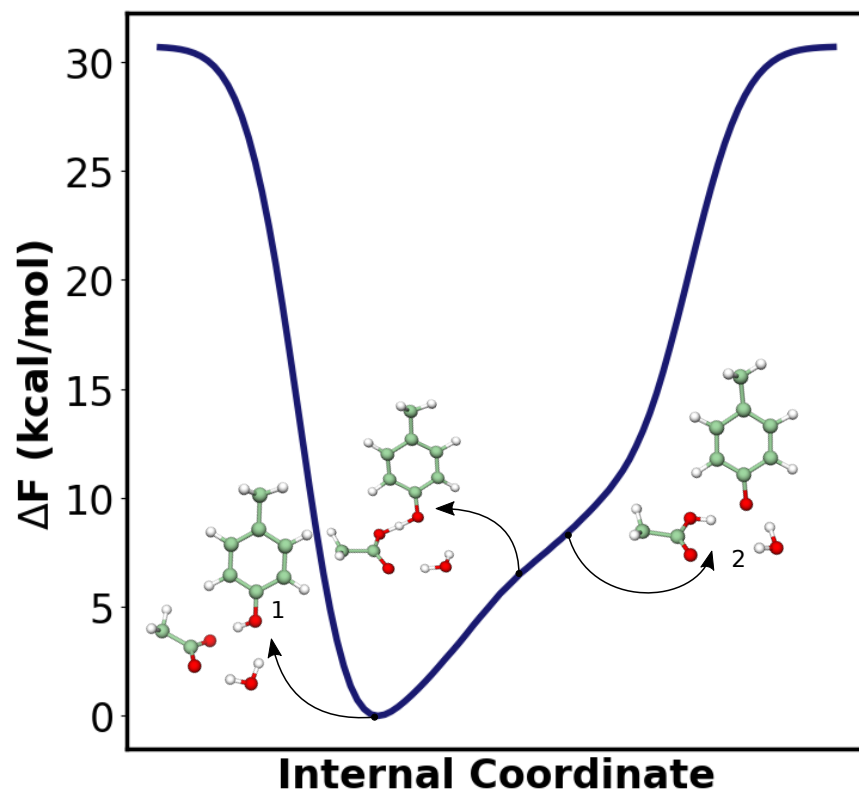

FIG. S21: Minimum Energy Path (MEP) connecting reactant and product for Path I. There is only a single minimum, and that belongs to the reactant(1). The shoulder peak represents the product (2). Here, free energy (from reactant minima to the shoulder)  $\Delta F \approx 7\text{kcal/mol}$ .



## S8. PATH II: DIRECT PROTON TRANSFER FOLLOWED BY OH<sup>-</sup> FORMATION

Tyr<sub>42</sub>O<sup>-</sup> is solvated, and so there is a possibility that the nucleophile formed in Path I can abstract a proton from nearby water to form OH<sup>-</sup>, the second nucleophile (fig. S22a), named as Path II. CV defined according to the scheme is given (fig. S22b). Expected CV values and corresponding structures are shown in fig. S23.

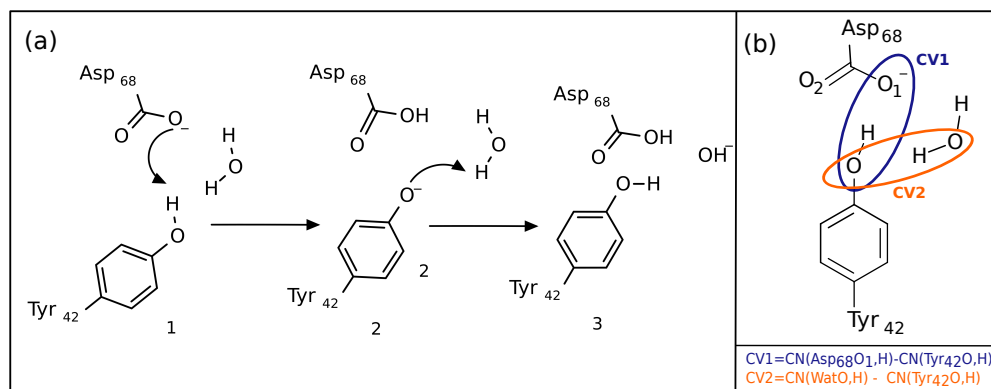

FIG. S22: (a) Reaction scheme for Path II: Tyr<sub>42</sub>O<sup>-</sup> from Path I abstracts a proton from neighbouring water to form OH<sup>-</sup>. (b) CV definition for Path II. Encircled in blue and orange are those atoms defined in CV1 and CV2, respectively.

| CV1  | CV2  | Structure                                                                          |
|------|------|------------------------------------------------------------------------------------|
| -0.5 | -0.5 | 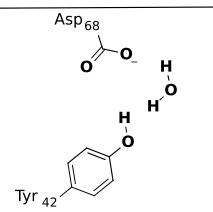 |
| +0.5 | -0.5 |  |
| +0.5 | +0.5 |  |

FIG. S23: Values expected for CV in the reactant and product states for Path II.

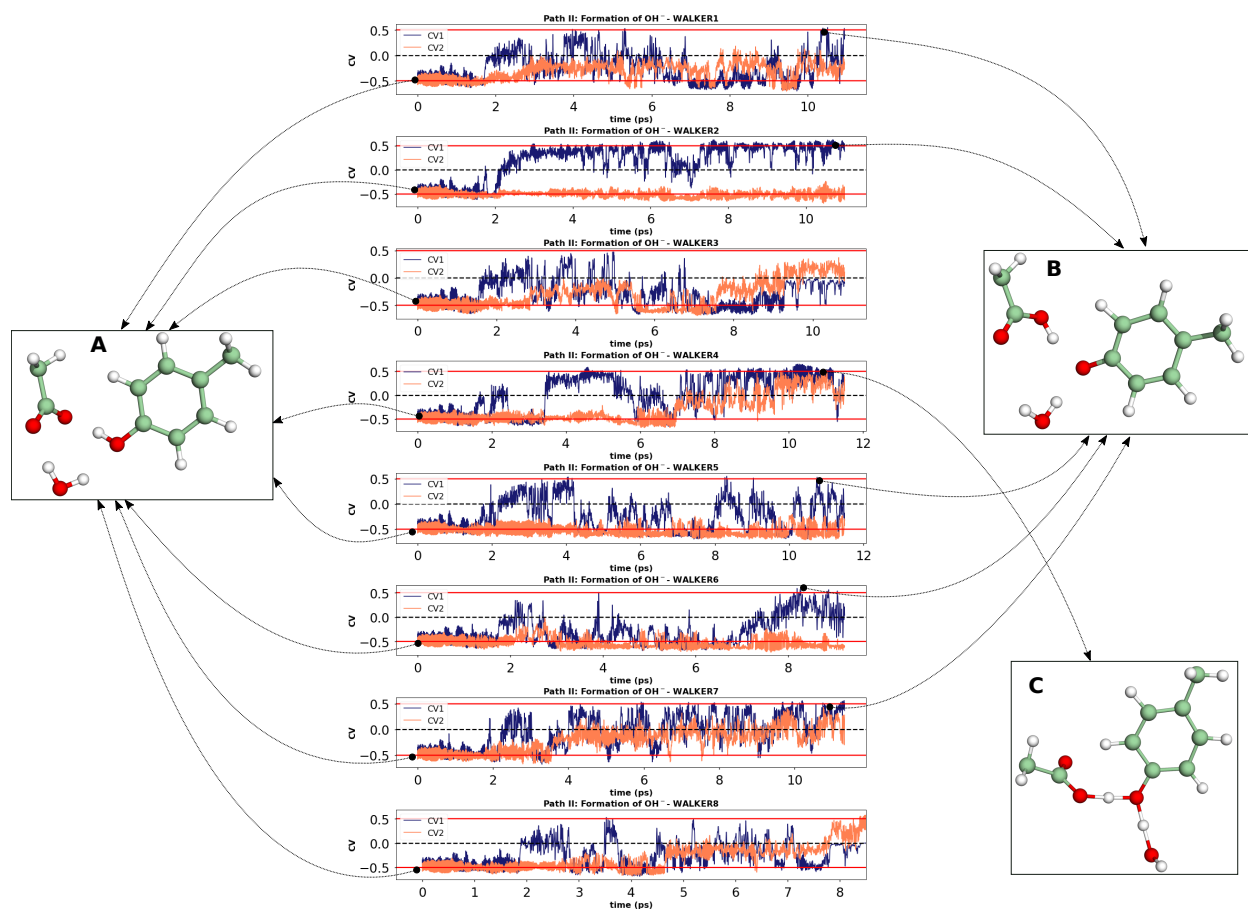

FIG. S24: Time evolution of CV for Path II. CV1 and CV2 are represented by blue and orange lines, respectively. Images in the insight represent reactant (A) and product states for a given CV value. Clearly, five of the walkers show  $\text{Tyr}_{42}\text{O}^-$  (B) formation only, while walker 4 shows the  $\text{OH}^-$  formation (C), but as seen, it has only transient existence.

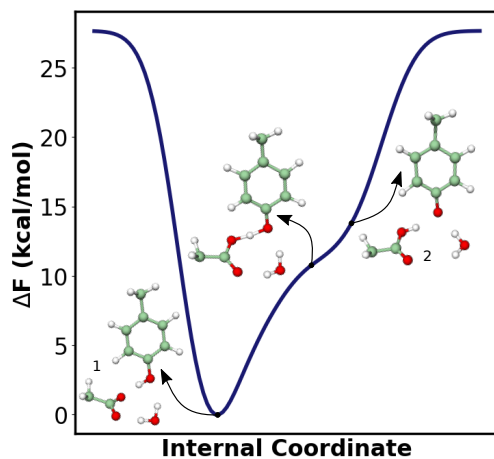

FIG. S25: Minimum Energy Path (MEP) for Path II resembles Path I. Formation of  $\text{OH}^-$  is not identified in MEP. Here,  $\Delta F \approx 10\text{kcal/mol}$ .

### S9. TYR<sub>42</sub>O<sup>-</sup> ATTACK ON DISULFIDE

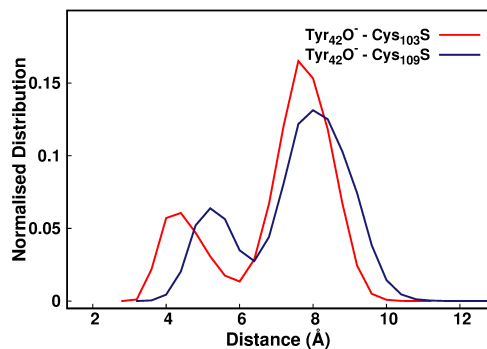

FIG. S26: Normalized distribution for the distance between Tyr<sub>40</sub>O<sup>-</sup>-Cys<sub>103</sub>S and Tyr<sub>42</sub>O<sup>-</sup>-Cys<sub>109</sub>S.

### S10. STATIC CALCULATION ON DISULFIDE CLEAVAGE

#### A. Static Calculation on Path IA: S<sub>N</sub>2 by TyrO<sup>-</sup>

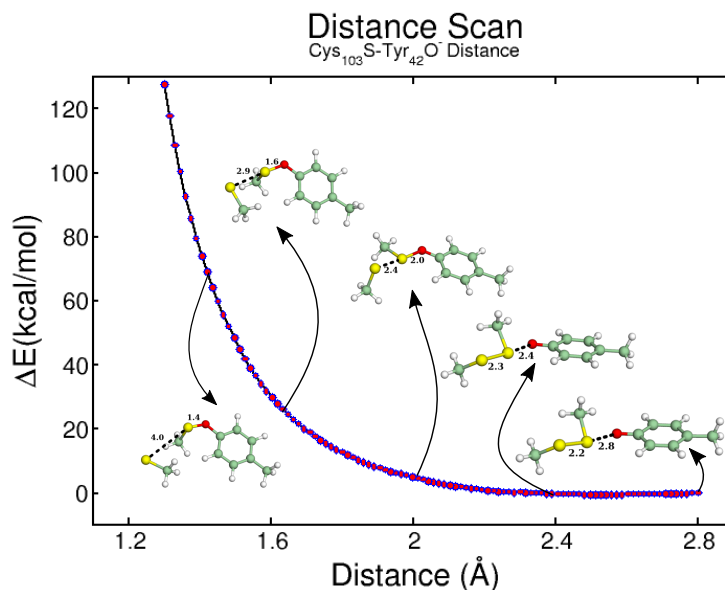

FIG. S27: QM Calculation for Path IA: Tyr<sub>42</sub>O<sup>-</sup> formation followed by S<sub>N</sub>2 involved disulfide cleavage

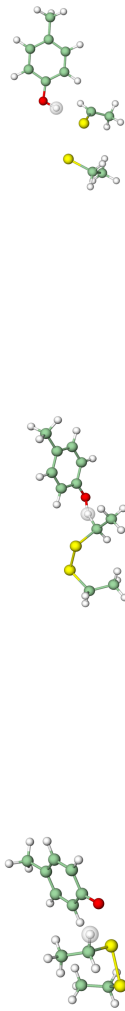

31

31

31

|   |                   |                     |                    |   |                    |                   |                    |                    |                    |
|---|-------------------|---------------------|--------------------|---|--------------------|-------------------|--------------------|--------------------|--------------------|
| C | 32.25232241026187 | 44.93674847705608   | 39.30341388812580  | C | 24.58659455488688  | 50.52448086554966 | 42.48229991649252  | 43.726931580376841 | 39.8594287951115   |
| H | 31.59855783800944 | 44.19391544600337   | 38.80834773974156  | H | 23.359929560065643 | 49.61287506132856 | 42.57899370279865  | 30.14693526383396  | 43.19710802774925  |
| H | 33.06243946675729 | 45.18671051279687   | 38.59394162235586  | H | 24.493206940000963 | 51.07388904688227 | 43.43679079849727  | 31.87818367612221  | 43.47398434598499  |
| C | 31.48554153423879 | 46.17644868440291   | 39.72558015975228  | C | 26.03923107725095  | 50.21087793542070 | 42.163521666033246 | 30.618186853455153 | 45.22732364314952  |
| C | 30.16720028189281 | 46.09562681681701   | 40.23357510947496  | C | 26.46540468242239  | 49.95074750131185 | 40.84121993861670  | 29.35967857945296  | 45.76686633336343  |
| H | 29.67829591683542 | 45.11231633488213   | 40.28942916363259  | H | 25.72966163820279  | 49.99082854802707 | 40.02572520277110  | 28.54727489750403  | 45.08930250052670  |
| C | 29.46908076541237 | 47.22712151869126   | 40.66487553885703  | C | 27.739597227592188 | 49.63834421388292 | 40.54378380585838  | 29.12469972074254  | 47.14819542575390  |
| H | 28.44844589538682 | 47.141131166874218  | 41.05188021268307  | H | 28.11045393482011  | 49.44835813721027 | 39.51173102020908  | 28.14927885687494  | 47.55937290341686  |
| C | 30.04784704226954 | 48.54987947907403   | 40.62192374622387  | C | 28.80446576908239  | 49.56303428550076 | 41.56469328156489  | 30.15382875611380  | 48.05026050620351  |
| O | 29.36249451541030 | 49.58128029177821   | 41.04387602195430  | O | 30.05635999865346  | 49.28948999665567 | 41.2626900058741   | 29.8560478190618   | 49.37530800046497  |
| C | 31.38605317821638 | 48.61336513252478   | 40.08932207076393  | C | 28.356004741103744 | 49.82390577621554 | 42.90619972763852  | 31.42521011738455  | 47.52161463136770  |
| H | 31.85855491769172 | 49.59512363757433   | 40.01288629824349  | H | 29.08482276538371  | 49.76442703827489 | 43.71937320087482  | 32.22727151577573  | 48.20255708087096  |
| C | 32.06391145374642 | 47.46387177289088   | 39.66455457157623  | C | 27.02035856471361  | 50.14679725701657 | 43.17775452616428  | 31.636987941866575 | 46.135600609911680 |
| H | 33.08296909581213 | 47.56614693666642   | 39.26704487579146  | H | 26.72314563330312  | 50.35043969023944 | 44.21583708493996  | 45.74849406101522  | 40.47185242446838  |
| C | 31.81457143782207 | 50.37525620437281   | 43.34608513272830  | C | 31.09286758148397  | 52.13360855649006 | 42.26452171258168  | 33.78739979391086  | 50.75405464618197  |
| H | 32.71339308819642 | 51.00490491844432   | 43.2419641094734   | H | 31.68945301843634  | 52.99883935846039 | 42.61037485323101  | 33.41865471714158  | 51.47035860376110  |
| C | 30.54884802573771 | 51.16859456027505   | 43.00012621279702  | C | 31.67019000039717  | 50.7508999998804  | 42.6076500001695   | 32.69958361242149  | 50.33547875851546  |
| H | 30.45113864294467 | 52.06138350626676   | 43.63763283461169  | H | 32.72146785771874  | 50.68991806002806 | 42.2732077928160   | 31.92205176071573  | 49.08152123149621  |
| H | 29.65324286804373 | 50.54156796674190   | 43.10186717785567  | H | 30.87266000229236  | 49.80174999999277 | 42.04297999791953  | 30.67607408288385  | 49.937928383066964 |
| S | 30.45895449160612 | 51.79383614096525   | 41.22348014770898  | S | 31.74991986805303  | 50.65268076986718 | 44.50502807314209  | 32.39216119806890  | 51.13280936517162  |
| C | 34.01451949489145 | 52.28648965862831   | 40.95976892551847  | C | 35.13463887110711  | 51.43754481530334 | 43.91151417807146  | 33.037780003544382 | 54.66037921618727  |
| H | 33.48471887371314 | 51.32540665085881   | 41.04194294052044  | H | 34.25642365024227  | 52.02240252623908 | 43.59721767410095  | 33.22048513757097  | 53.68130097021574  |
| C | 33.06379065795068 | 53.36741009259332   | 40.427529808056030 | C | 34.80165869664059  | 50.62397739529455 | 45.17236532333992  | 32.63330229461073  | 54.47435493667051  |
| H | 32.70345496735418 | 53.09540280300309   | 39.42140480471737  | H | 34.54470341257482  | 51.29978837128994 | 46.009226926250702 | 33.45869986942077  | 53.98104297741853  |
| H | 33.58031202573248 | 54.34047003487533   | 40.33966142512385  | H | 35.05618563386876  | 50.00207602498382 | 45.48765576638556  | 32.47817239254075  | 55.46361224796850  |
| S | 31.57709285104232 | 53.70263547827081   | 41.50009911529621  | S | 33.39344469662185  | 49.4145356192605  | 44.95156618844241  | 31.09345110658290  | 53.46760853011459  |
| H | 31.7658494326269  | 50.01599553091155   | 44.39282404602111  | H | 30.9941062707014   | 52.19785238806379 | 41.16480330097190  | 34.19727497600369  | 49.88433675547201  |
| H | 34.87628059658144 | 52.14916671450582   | 40.27840817163290  | H | 35.9687263765382   | 52.1388843544054  | 44.10523540234900  | 33.96018824882120  | 55.27152055466250  |
| H | 32.73317447488923 | 44.40983651471853   | 40.15567408120351  | H | 24.11374929392754  | 51.1449330233241  | 41.6968949108828   | 30.74174054771670  | 43.29366232172682  |
| H | 31.91298956232867 | 49.50304323500641   | 42.68277379683655  | H | 30.07347437260520  | 52.25333632651977 | 42.67120168789614  | 34.61612291083434  | 51.25297611727126  |
| H | 34.39741299024864 | 52.5550232324965418 | 41.95794625058463  | H | 35.41854964148283  | 50.77291387464118 | 43.07941301168445  | 32.22981962885873  | 55.15655986774016  |

TABLE S2: Coordinates for reactant (1), transition state (TS1), and product (5) for  $\alpha$ -elimination by  $\text{TyrO}^-$

## B. Static Calculation on Path IB: $\alpha$ -elimination by $\text{TyrO}^-$

### S11. STABILIZATION OF TYR<sub>42</sub>O<sup>-</sup>

As it can be seen that a water wire facilitates proton transfer between far away Tyr<sub>42</sub>O<sup>-</sup> and Asp<sub>68</sub> QM/MM metadynamics simulations were conducted. Tyr<sub>42</sub>O<sup>-</sup> abstracts a proton from nearby water to form OH<sup>-</sup>, later OH<sup>-</sup> propagates through water network to take a proton from Asp<sub>68</sub>OH to finally form Asp<sub>68</sub> as the product (fig. S28a). Definition of CV based on the reaction scheme is given in (fig. S28b).

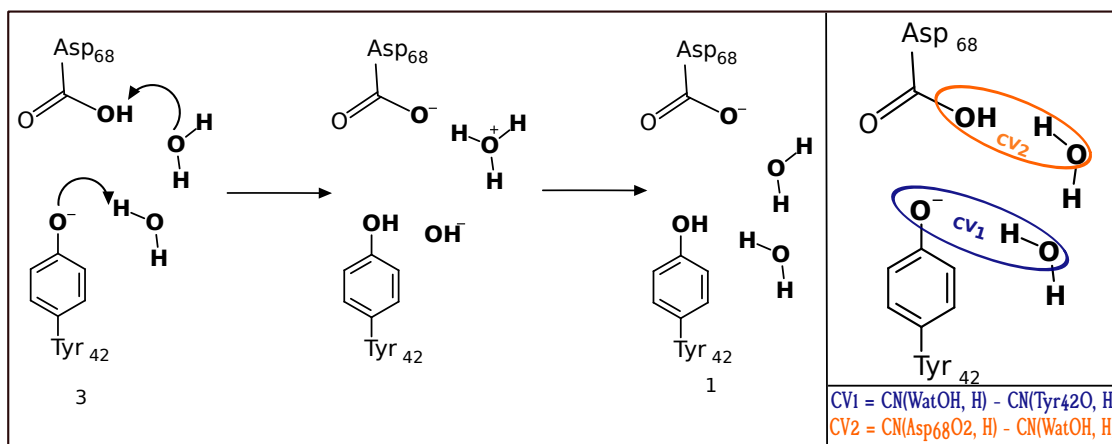

FIG. S28: (a) Reaction scheme for solvent assisted proton transfer between Tyr<sub>42</sub>O<sup>-</sup>, Asp<sub>68</sub>OH to form Tyr<sub>42</sub> and Asp<sub>68</sub>. (b) Definition of CV as per the scheme. CV1 shows abstraction of a proton by Tyr<sub>42</sub>O<sup>-</sup> from water to form Tyr<sub>42</sub>, OH<sup>-</sup> and CV2 represents the donation of a proton to nearby water by Asp<sub>68</sub>OH to finally form Asp<sub>68</sub>.

| CV1  | CV2  | Structure |
|------|------|-----------|
| -0.5 | -0.5 |           |
| +0.5 | -0.5 |           |
| -0.5 | +0.5 |           |
| +0.5 | +0.5 |           |

FIG. S29: Values expected for CV in the reactant and product states for solvent assisted proton transfer between  $\text{Tyr}_{42}\text{O}^-$  and  $\text{Asp}_{68}\text{OH}$ .



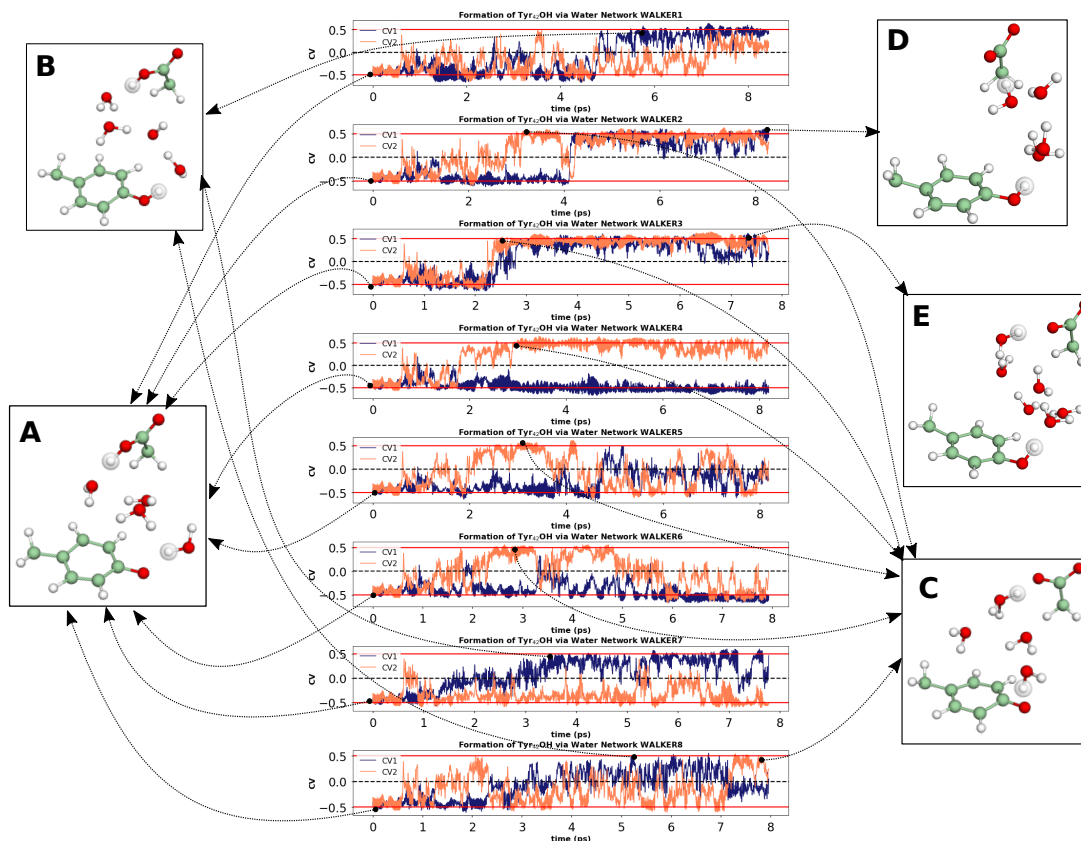

FIG. S30: Evolution of CVs' with time for  $\text{Tyr}_{42}\text{O}^-$  stability. Blue lines represent CV1 and orange CV2. Structure for reactant(2) here is **A**. To distinguish hydrogen atoms involved in the CVs, they are highlighted. **B** shows the formation of  $\text{OH}^-$  with positive CV1. Here, walkers: 1, 7, and 8 form  $\text{OH}^-$  only. When CV2 alone is positive, it indicates the formation of  $\text{H}_3\text{O}^+$  (**C**), which is formed by the majority of the walkers. As it can be seen for walkers: 2 and 3, both CV1 and CV2 have +0.5, forming product(1) (**D**) - four water network and (**E**) - six water network.

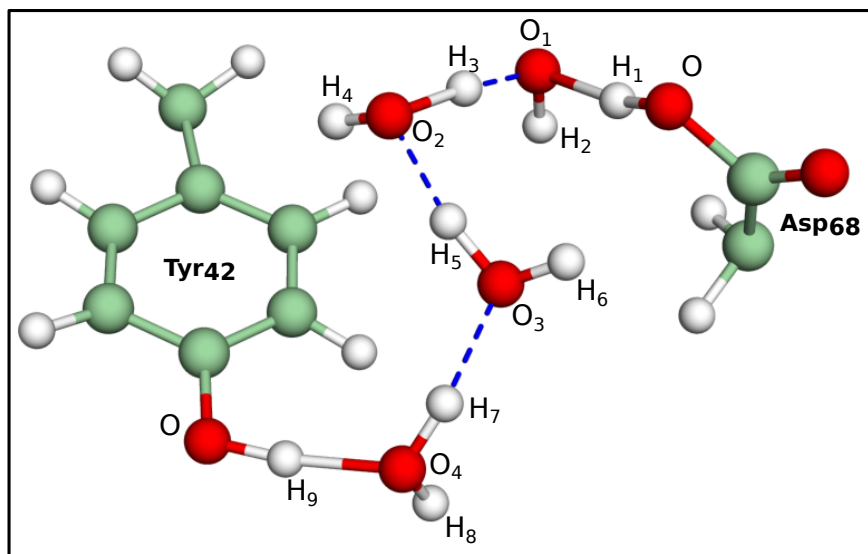

FIG. S31: Snapshot showing four water network.

**S12. REFERENCES**

- [1] H. M. Berman, *Nucleic Acids Res.* **28**, 235 (2000).
- [2] Schrödinger, LLC, “The PyMOL molecular graphics system, version 1.8,” (2015).
- [3] E. Lindahl, B. Hess, and D. van der Spoel, *J. Mol. Model.* **7**, 306 (2001).
- [4] M. J. Abraham, T. Murtola, R. Schulz, S. Páll, J. C. Smith, B. Hess, and E. Lindahl, *SoftwareX* **1-2**, 19 (2015).
- [5] W. L. Jorgensen, J. Chandrasekhar, J. D. Madura, R. W. Impey, and M. L. Klein, *J. Chem. Phys.* **79**, 926 (1983).
- [6] K. Lindorff-Larsen, S. Piana, K. Palmo, P. Maragakis, J. L. Klepeis, R. O. Dror, and D. E. Shaw, *Proteins: Struct. Funct. Bioinf.* **78**, 1950 (2010).
- [7] B. Hess, H. Bekker, H. J. Berendsen, and J. G. Fraaije, *J. Comp. Chem.* **18**, 1463 (1997).
- [8] T. Darden, D. York, and L. Pedersen, *J. Chem. Phys.* **98**, 10089 (1993).
- [9] U. Essmann, L. Perera, M. L. Berkowitz, T. Darden, H. Lee, and L. G. Pedersen, *J. Chem. Phys.* **103**, 8577 (1995).
- [10] W. Humphrey, A. Dalke, and K. Schulten, *J Mol Graph.* **14**, 33 (1996).
- [11] D. Case, I. Ben-Shalom, S. Brozell, D. Cerutti, T. Cheatham, III, V. Cruzeiro, T. Darden, R. Duke, D. Ghoreishi, M. Gilson, H. Gohlke, A. Goetz, D. Greene, R. Harris, N. Homeyer, Y. Huang, S. Izadi, A. Kovalenko, T. Kurtzman, T. Lee, S. LeGrand, P. Li, C. Lin, J. Liu, T. Luchko, R. Luo, D. Mermelstein, K. Merz, Y. Miao, G. Monard, C. Nguyen, H. Nguyen, I. Omelyan, A. Onufriev, F. Pan, R. Qi, D. Roe, A. Roitberg, C. Sagui, S. Schott-Verdugo, J. Shen, C. Simmerling, J. Smith, R. SalomonFerrer, J. Swails, R. Walker, J. Wang, H. Wei, R. Wolf, X. Wu, L. Xiao, D. York, and P. Kollman, AMBER 2018, University of California, San Francisco (2018).
- [12] C. U. Stirnimann, A. Rozhkova, U. Grauschopf, R. A. Böckmann, R. Glockshuber, G. Capitani, and M. G. Grütter, *J. Mol. Biol.* **358**, 829 (2006).
- [13] G. Bussi, D. Donadio, and M. Parrinello, *J. Chem. Phys.* **126**, 014101 (2007).
- [14] M. Parrinello and A. Rahman, *Int. J. Appl. Phys.* **52**, 7182 (1981).
- [15] D. Marx and J. Hutter, Ab Initio Molecular Dynamics: Basic Theory and Advanced Methods (Cambridge University Press, 2009).

- [16] J. Hutter, M. Iannuzzi, F. Schiffmann, and J. VandeVondele, *Wiley Interdiscip. Rev. Comput. Mol. Sci.* **4**, 15 (2013).
- [17] B. G. Lippert, J. H. Parinello, and Michele, *Mol. Phys.* **92**, 477 (1997).
- [18] A. D. Becke, *Phys. Rev. A* **38**, 3098 (1988).
- [19] C. Lee, W. Yang, and R. G. Parr, *Phys. Rev. B* **37**, 785 (1988).
- [20] S. Grimme, J. Antony, S. Ehrlich, and H. Krieg, *J. Chem. Phys.* **132**, 154104 (2010).
- [21] S. Grimme, S. Ehrlich, and L. Goerigk, *Journal of Computational Chemistry* **32**, 1456 (2011).
- [22] J. VandeVondele and J. Hutter, *J. Chem. Phys.* **127**, 114105 (2007).
- [23] S. Goedecker, M. Teter, and J. Hutter, *Phys. Rev. B* **54**, 1703 (1996).
- [24] C. Hartwigsen, S. Goedecker, and J. Hutter, *Phys. Rev. B* **58**, 3641 (1998).
- [25] J. Hostaš and J. Řezáč, *J. Chem. Theory and Comput.* **13**, 3575 (2017).
- [26] P. Dopieralski, J. Ribas-Arino, P. Anjukandi, M. Krupicka, and D. Marx, *Nat. Chem.* **9**, 164 (2017).
- [27] P. Dopieralski, J. Ribas-Arino, P. Anjukandi, M. Krupicka, and D. Marx, *Angew. Chem. Int. Ed.* **55**, 1304 (2016).
- [28] P. Dopieralski, J. Ribas-Arino, P. Anjukandi, M. Krupicka, J. Kiss, and D. Marx, *Nat. Chem.* **5**, 685 (2013).
- [29] J. A. Maier, C. Martinez, K. Kasavajhala, L. Wickstrom, K. E. Hauser, and C. Simmerling, *J. Chem. Theory and Comput.* **11**, 3696 (2015).
- [30] F. Maseras and K. Morokuma, *J. Comp. Chem.* **16**, 1170 (1995).
- [31] N. Reuter, A. Dejaegere, B. Maigret, and M. Karplus, *J. Phys. Chem. A* **104**, 1720 (2000).
- [32] M. J. Field, P. A. Bash, and M. Karplus, *J. Comp. Chem.* **11**, 700 (1990).
- [33] T. Laino, F. Mohamed, A. Laio, and M. Parrinello, *Journal of Chemical Theory and Computation* **1**, 1176 (2005).
- [34] T. Laino, F. Mohamed, A. Laio, and M. Parrinello, *J. Chem. Theory and Comput.* **2**, 1370 (2006).
- [35] S. Nosé, *J. Chem. Phys.* **81**, 511 (1984).
- [36] S. Nose, *Mol. Phys.* **52**, 255 (1984).
- [37] A. Laio and M. Parrinello, *Proc. Natl. Acad. Sci.* **99**, 12562 (2002).
- [38] P. Raiteri, A. Laio, F. L. Gervasio, C. Micheletti, and M. Parrinello, **110**, 3533 (2006).
- [39] W. J. Hehre, R. Ditchfield, and J. A. Pople, *J. Chem. Phys.* **56**, 2257 (1972).

- [40] F. Neese, *WIREs Comput. Mol. Sci* **8**, e1327 (2018).
- [41] P. W. Haebel, D. Goldstone, F. Katzen, J. Beckwith, and P. Metcalf, *EMBO J.* **21**, 4774 (2002).
- [42] C. W. Goulding, M. R. Sawaya, A. Parseghian, V. Lim, D. Eisenberg, and D. Missiakas, *Biochemistry* **41**, 6920 (2002).
- [43] D. A. Mavridou, E. Saridakis, P. Kritsiligkou, A. D. Goddard, J. M. Stevens, S. J. Ferguson, and C. Redfield, *J. Biol. Chem.* **286**, 24943 (2011).
- [44] L. S. Stelzl, D. A. Mavridou, E. Saridakis, D. Gonzalez, A. J. Baldwin, S. J. Ferguson, M. S. Sansom, and C. Redfield, *Elife* **9**, e54661 (2020).
- [45] G. R. Grimsley, J. M. Scholtz, and C. N. Pace, *Prot. Sci.* **18**, 247 (2009).
- [46] “Centre for Information Biology, Ochanomizu University accessible surface area and accessibility calculation for protein, 2012,” <http://cib.cf.ocha.ac.jp/bitool/ASA/>, accessed: 2022-02-05.
- [47] E. Krissinel and K. Henrick, *J. Mol. Biol.* **372**, 774 (2007).
- [48] M. Heinig and D. Frishman, *Nucleic Acids Res.* **32**, W500 (2004).
- [49] R. Fraczekiewicz and W. Braun, *J. Comp. Chem.* **19**, 319 (1998).
- [50] J. Sevcik, Z. Dauter, V. Lamzin, and K. Wilson, **52**, 327 (1996).
- [51] R. Diamond, *J. Mol. Biol.* **82**, 371 (1974).
- [52] T. S. Ulmer, A. Bax, N. B. Cole, and R. L. Nussbaum, *J. Biol. Chem.* **280**, 9595 (2005).
- [53] S. Vijay-Kumar, C. E. Bugg, and W. J. Cook, *J. Mol. Biol.* **194**, 531 (1987).
- [54] K. Edman, P. Nollert, A. Royant, H. Belrhali, E. Pebay-Peyroula, J. Hajdu, R. Neutze, and E. M. Landau, *Nature* **401**, 822 (1999).
- [55] T. K. Harris and G. J. Turner, *IUBMB Life* **53**, 85 (2002).
- [56] M.-F. Jeng, A. P. Campbell, T. Begley, A. Holmgren, D. A. Case, P. E. Wright, and H. J. Dyson, *Structure* **2**, 853 (1994).
- [57] C. U. Stirnimann, A. Rozhkova, U. Grauschopf, R. A. Böckmann, R. Glockshuber, G. Capitanì, and M. G. Grütter, *J. Mol. Biol.* **358**, 829 (2006).
- [58] A. K. Shaytan, K. V. Shaitan, and A. R. Khokhlov, *Biomacromolecules* **10**, 1224 (2009).
- [59] T. Meyer, G. Kieseritzky, and E.-W. Knapp, *Proteins: Struct. Funct. Genet.* **79**, 3320 (2011).
